# Supplementary material for: Mapping the polysaccharide degradation potential of Aspergillus niger
Source: PubMed Central journal article supplement (PMC3542576; doi:10.1186/1471-2164-13-313), 2012-07-16

# Galactoglucomannan (insoluble)

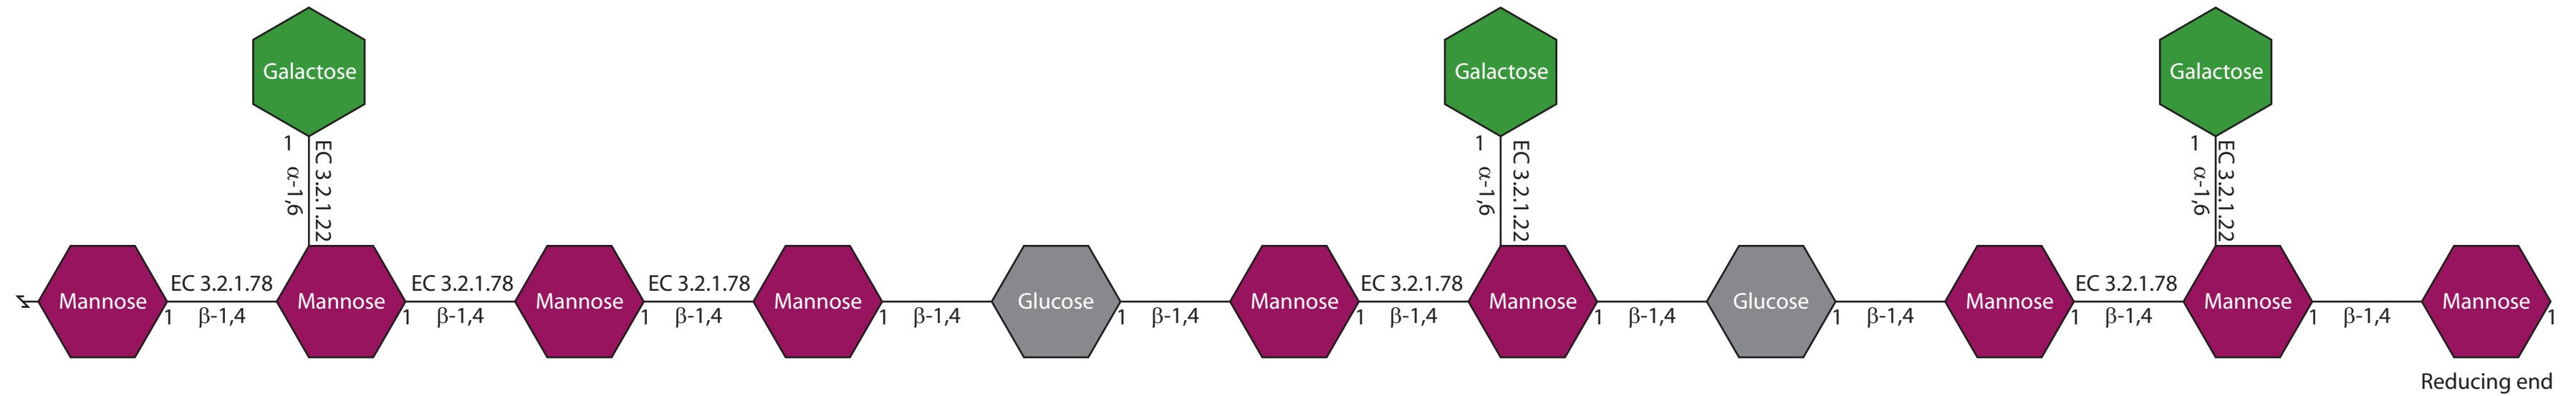

## Oligos

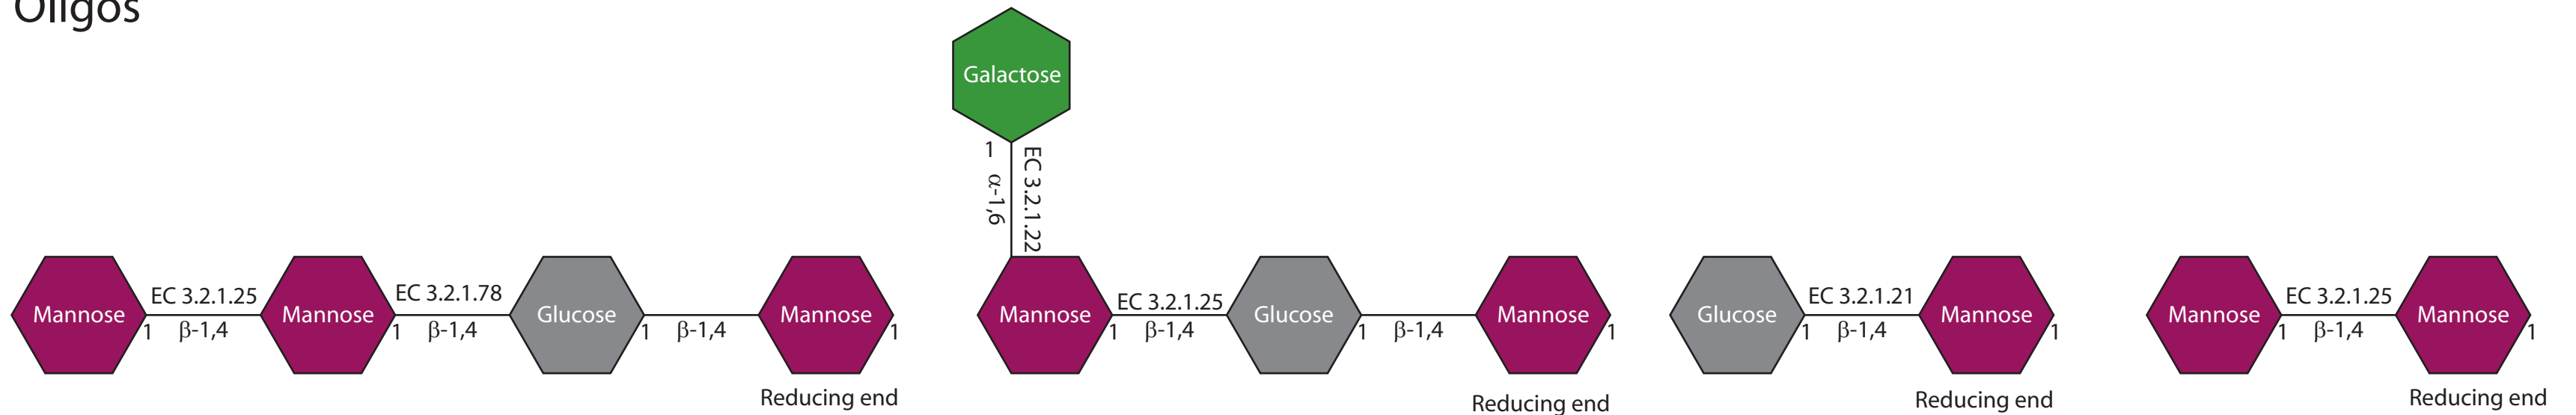

Supplement: 1471-2164-13-313-S6.pdf [file 1471-2164-13-313-S6.pdf]
