# Supplementary material for: Mapping the polysaccharide degradation potential of Aspergillus niger
Source: PubMed Central journal article supplement (PMC3542576; doi:10.1186/1471-2164-13-313), 2012-07-16
Supplement: 1471-2164-13-313-S17.pdf [file 1471-2164-13-313-S17.pdf]

Table 1: Enzymatic activities required for the degradation of starch by *A. niger*. For each isoenzyme, putative or characterized, is noted literature references and the gene ID in the sequencings of *A. niger* CBS 513.88 and ATCC 1015. Genes for *amyA* and *amyB* are not noted in the ATCC sequence list, as three almost identical genes exist *amyA*, *amyB* and ORF 140567. As the genes in the ATCC 1015 sequence are found by bi-directional best hits, it is, due to sequence differences between the two strains, not possible to determine 1:1 relationships for all three genes. However, ORF 140567 can be used as indicative for all of them. The list of necessary enzymes is gathered from [59].

| EC number | Name                                                | Gene characterization | Specificity | Gene             | Uniprot | CBS 513.88 | ATCC 1015 |
|-----------|-----------------------------------------------------|-----------------------|-------------|------------------|---------|------------|-----------|
| 3.2.1.3   | glucoamylase (exo-1,4-glucosidase/amyloglucosidase) |                       |             |                  |         | An02g00850 | 206445    |
| 3.2.1.3   | glucoamylase (exo-1,4-glucosidase/amyloglucosidase) |                       |             |                  |         | An02g06950 | 37060     |
| 3.2.1.3   | glucoamylase (exo-1,4-glucosidase/amyloglucosidase) | [100-202]             |             | <i>glaA</i>      | P69328  | An03g06550 | 213597    |
| 3.2.1.1   | $\alpha$ -amylase                                   |                       |             |                  |         | An04g06930 | 45304     |
| 3.2.1.1   | $\alpha$ -amylase                                   | [155]                 |             | <i>amyA/amyB</i> | P56271  | An05g02100 | N/A       |
| 3.2.1.1   | $\alpha$ -amylase                                   |                       |             |                  |         | An09g03100 | 188489    |
| 3.2.1.1   | $\alpha$ -amylase                                   | [155]                 |             | <i>amyA/amyB</i> | P56271  | An12g06930 | N/A       |
| 3.2.1.1   | $\alpha$ -amylase                                   |                       |             |                  |         | An09g03110 | 122069    |
| 3.2.1.1   | $\alpha$ -amylase                                   |                       |             |                  |         | An11g03340 | 140567    |
| 3.2.1.1   | $\alpha$ -amylase                                   |                       |             |                  |         | An12g02460 | 57002     |
| 3.2.1.1   | $\alpha$ -amylase                                   |                       |             |                  |         | An15g07800 | 182162    |
| 3.2.1.41  | $\alpha$ -1,4-pullulanase                           | [154,191]             |             |                  |         |            |           |
| 3.2.1.3   | glucoamylase (exo-1,4-glucosidase/amyloglucosidase) | [92]                  |             |                  |         | An02g00850 | 206445    |
| 3.2.1.3   | glucoamylase (exo-1,4-glucosidase/amyloglucosidase) |                       |             |                  |         | An02g06950 | 37060     |
| 3.2.1.3   | glucoamylase (exo-1,4-glucosidase/amyloglucosidase) | [92,100-202]          |             | <i>glaA</i>      | P69328  | An03g06550 | 213597    |
| 3.2.1.20  | $\alpha$ -glucosidase                               |                       |             |                  |         | An13g03710 | 50927     |
| 3.2.1.20  | $\alpha$ -glucosidase                               |                       |             |                  |         | An01g04880 | 55419     |
| 3.2.1.20  | $\alpha$ -glucosidase                               | [177]                 |             | <i>aglA/aglU</i> | P56526  | An04g06920 | 214233    |
| 3.2.1.20  | $\alpha$ -glucosidase                               |                       |             |                  |         | An07g00350 | 40261     |
| 3.2.1.20  | $\alpha$ -glucosidase                               |                       |             |                  |         | An09g05880 | 128654    |
| 3.2.1.3   | glucoamylase (exo-1,4-glucosidase/amyloglucosidase) |                       |             |                  |         | An02g00850 | 206445    |
| 3.2.1.3   | glucoamylase (exo-1,4-glucosidase/amyloglucosidase) |                       |             |                  |         | An02g06950 | 37060     |
| 3.2.1.3   | glucoamylase (exo-1,4-glucosidase/amyloglucosidase) | [100-202]             |             | <i>glaA</i>      | P69328  | An03g06550 | 213597    |

Table 2: Enzymatic activities required for the degradation of cellulose by *A. niger*. For each isoenzyme, putative or characterized, is noted literature references and the gene ID in the sequencings of *A. niger* CBS 513.88 and ATCC 1015. The list of necessary enzymes is gathered from the work by [19,60].

| EC number | Name                                                       | Gene characterization | Specificity | Gene        | Uniprot | CBS 513.88 | ATCC 1015 |
|-----------|------------------------------------------------------------|-----------------------|-------------|-------------|---------|------------|-----------|
| 3.2.1.91  | Cellulose 1,4- $\beta$ -cellobiosidase (Cellobiohydrolase) | [51]                  |             | <i>cbhA</i> | Q9UVS9  | An07g09330 | 53159     |
| 3.2.1.91  | Cellulose 1,4- $\beta$ -cellobiosidase (Cellobiohydrolase) | [51]                  |             | <i>cbhB</i> | Q9UVS8  | An01g11660 | 51773     |
| 3.2.1.91  | Cellulose 1,4- $\beta$ -cellobiosidase (Cellobiohydrolase) |                       |             |             |         | An12g02220 | 54490     |
| 3.2.1.4   | endo-glucanase                                             | [41,139,140,150]      | [134]       | <i>eglA</i> | O74705  | An14g02760 | 211053    |
| 3.2.1.4   | endo-glucanase                                             | [41,87,138,150]       | [134]       | <i>eglB</i> | O74706  | An07g08950 | 209376    |
| 3.2.1.4   | endo-glucanase                                             |                       |             |             |         | An03g01050 | 194447    |
| 3.2.1.4   | endo-glucanase                                             |                       |             |             |         | An03g05380 | N/A       |
| 3.2.1.4   | endo-glucanase                                             |                       |             |             |         | An03g05530 | 191511    |
| 3.2.1.4   | endo-glucanase                                             |                       |             |             |         | An04g08550 | 194765    |
| 3.2.1.4   | endo-glucanase                                             |                       |             |             |         | An08g01760 | 133986    |
| 3.2.1.4   | endo-glucanase                                             |                       |             |             |         | An15g04900 | 182430    |
| 3.2.1.21  | $\beta$ -glucosidase                                       |                       |             |             |         | An03g03740 | 213437    |
| 3.2.1.21  | $\beta$ -glucosidase                                       |                       |             |             |         | An03g05330 | 44520     |
| 3.2.1.21  | $\beta$ -glucosidase                                       |                       |             |             |         | An04g03170 | 131747    |
| 3.2.1.21  | $\beta$ -glucosidase                                       |                       |             |             |         | An06g02040 | 176601    |
| 3.2.1.21  | $\beta$ -glucosidase                                       |                       |             |             |         | An07g07630 | 139037    |
| 3.2.1.21  | $\beta$ -glucosidase                                       |                       |             |             |         | An07g09760 | N/A       |
| 3.2.1.21  | $\beta$ -glucosidase                                       |                       |             |             |         | An08g08240 | 38077     |
| 3.2.1.21  | $\beta$ -glucosidase                                       |                       |             |             |         | An11g06080 | 208871    |
| 3.2.1.21  | $\beta$ -glucosidase                                       |                       |             |             |         | An11g06090 | N/A       |
| 3.2.1.21  | $\beta$ -glucosidase                                       |                       |             |             |         | An14g01770 | 210981    |
| 3.2.1.21  | $\beta$ -glucosidase                                       |                       |             |             |         | An15g01890 | 182309    |
| 3.2.1.21  | $\beta$ -glucosidase                                       |                       |             |             |         | An15g04800 | 181816    |
| 3.2.1.21  | $\beta$ -glucosidase                                       |                       |             |             |         | An17g00520 | 129891    |
| 3.2.1.21  | $\beta$ -glucosidase                                       | [30-36,137,223]       |             | <i>bgl1</i> | A2RAL4  | An18g03570 | 56782     |

Table 3: Enzymatic activities required for the degradation of pullulan by *A. niger*. For each isoenzyme, putative or characterized, is noted literature references and the gene ID in the sequencings of *A. niger* CBS 513.88 and ATCC 1015. The list of necessary enzymes is gathered from the work by [61].

| EC number | Name                                               | Gene characterization | Specificity | Gene        | Uniprot | CBS 513.88 | ATCC 1015 |
|-----------|----------------------------------------------------|-----------------------|-------------|-------------|---------|------------|-----------|
| 3.2.1.57  | isopullulanase                                     | [86,93,94,175,191]    | [93,191]    | <i>ipuA</i> | O00105  | N/A        | N/A       |
| 3.2.1.41  | pullulanase                                        | [154]                 | [94]        |             |         |            |           |
| 3.2.1.3   | glucoamylase (exo-1,4-glucosidase/amyloglucosidas) |                       |             |             |         | An02g00850 | 206445    |
| 3.2.1.3   | glucoamylase (exo-1,4-glucosidase/amyloglucosidas) |                       |             |             |         | An02g06950 | 37060     |
| 3.2.1.3   | glucoamylase (exo-1,4-glucosidase/amyloglucosidas) | [100-202]             |             | <i>glaA</i> | P69328  | An03g06550 | 213597    |

Table 4: Enzymatic activities required for the degradation of inulin by *A. niger*. For each isoenzyme, putative or characterized, is noted literature references and the gene ID in the sequencings of *A. niger* CBS 513.88 and ATCC 1015. The list of necessary enzymes is gathered from the work by [62].

| EC number | Name           | Gene characterization | Specificity | Gene                  | Uniprot | CBS 513.88 | ATCC 1015 |
|-----------|----------------|-----------------------|-------------|-----------------------|---------|------------|-----------|
| 3.2.1.7   | endo-inulinase | [7,88,178,226]        |             | <i>inuA/inuB</i>      | O74641  | An11g03200 | 52928     |
| 3.2.1.80  | exo-inulinase  | [7,176]               |             | <i>inuE/inuF/inu1</i> | Q0ZR33  | An12g08280 | 56664     |
| 3.2.1.80  | exo-inulinase  | [7,176]               |             | <i>inuE/inuF/inu1</i> | Q0ZR33  | An12g08280 | 56664     |
| 3.2.1.26  | invertase      | [7,125,218]           | [218]       | <i>sucB/suc2</i>      | Q0ZR36  | An15g00320 | N/A       |

Table 5: Enzymatic activities required for the degradation of galactomannan by *A. niger*. For each isoenzyme, putative or characterized, is noted literature references and the gene ID in the sequencings of *A. niger* CBS 513.88 and ATCC 1015. The list of necessary enzymes is gathered from the work by [19,63].

| EC number | Name                           | Gene characterization | Specificity | Gene        | Uniprot | CBS 513.88 | ATCC 1015 |
|-----------|--------------------------------|-----------------------|-------------|-------------|---------|------------|-----------|
| 3.2.1.78  | Endo-1,4- $\beta$ -D-mannanase | [22,132]              | [22,132]    |             |         | An05g01320 | 50378     |
| 3.2.1.78  | Endo-1,4- $\beta$ -D-mannanase |                       |             |             |         | An15g07760 | 40875     |
| 3.2.1.25  | $\beta$ -mannosidase           |                       |             |             |         | An01g06630 | 172587    |
| 3.2.1.25  | $\beta$ -mannosidase           | [23–25,132]           | [23,24,132] | <i>mndA</i> | Q9UUZ3  | An11g06540 | 138876    |
| 3.2.1.22  | $\alpha$ -galactosidase        | [24,26]               | [24]        | <i>aglC</i> | Q9UUZ4  | An09g00260 | 212736    |
| 3.2.1.22  | $\alpha$ -galactosidase        |                       |             |             |         | An01g01320 | 172232    |
| 3.2.1.22  | $\alpha$ -galactosidase        | [26,27]               |             | <i>aglB</i> | Q9Y865  | An02g11150 | 207264    |
| 3.2.1.22  | $\alpha$ -galactosidase        | [26,28,29]            |             | <i>aglA</i> | A2QL72  | An06g00170 | 37736     |
| 3.2.1.22  | $\alpha$ -galactosidase        |                       |             |             |         | An11g06330 | 39180     |
| 3.2.1.22  | $\alpha$ -galactosidase        |                       |             |             |         | An14g01800 | 185285    |

Table 6: Enzymatic activities required for the degradation of soluble galactoglucomannan by *A. niger*. For each isoenzyme, putative or characterized, is noted literature references and the gene ID in the sequencings of *A. niger* CBS 513.88 and ATCC 1015. The list of necessary enzymes is gathered from the work by [17–20].

| EC number | Name                           | Gene characterization | Specificity | Gene        | Uniprot | CBS 513.88 | ATCC 1015 |
|-----------|--------------------------------|-----------------------|-------------|-------------|---------|------------|-----------|
| 3.2.1.78  | Endo-1,4- $\beta$ -D-mannanase | [22]                  | [22]        |             |         | An05g01320 | 50378     |
| 3.2.1.78  | Endo-1,4- $\beta$ -D-mannanase |                       |             |             |         | An15g07760 | 40875     |
| 3.2.1.25  | $\beta$ -mannosidase           |                       |             |             |         | An01g06630 | 172587    |
| 3.2.1.25  | $\beta$ -mannosidase           | [23–25]               | [23,24]     | <i>mndA</i> | Q9UUZ3  | An11g06540 | 138876    |
| 3.2.1.22  | $\alpha$ -galactosidase        | [24,26]               | [24]        | <i>aglC</i> | Q9UUZ4  | An09g00260 | 212736    |
| 3.2.1.22  | $\alpha$ -galactosidase        |                       |             |             |         | An01g01320 | 172232    |
| 3.2.1.22  | $\alpha$ -galactosidase        | [26,27]               |             | <i>aglB</i> | Q9Y865  | An02g11150 | 207264    |
| 3.2.1.22  | $\alpha$ -galactosidase        | [26,28,29]            |             | <i>aglA</i> | A2QL72  | An06g00170 | 37736     |
| 3.2.1.22  | $\alpha$ -galactosidase        |                       |             |             |         | An11g06330 | 39180     |
| 3.2.1.22  | $\alpha$ -galactosidase        |                       |             |             |         | An14g01800 | 185285    |
| 3.2.1.21  | $\beta$ -glucosidase           |                       |             |             |         | An03g03740 | 213437    |
| 3.2.1.21  | $\beta$ -glucosidase           |                       |             |             |         | An03g05330 | 44520     |
| 3.2.1.21  | $\beta$ -glucosidase           |                       |             |             |         | An04g03170 | 131747    |
| 3.2.1.21  | $\beta$ -glucosidase           |                       |             |             |         | An06g02040 | 176601    |
| 3.2.1.21  | $\beta$ -glucosidase           |                       |             |             |         | An07g07630 | 139037    |
| 3.2.1.21  | $\beta$ -glucosidase           |                       |             |             |         | An07g09760 | N/A       |
| 3.2.1.21  | $\beta$ -glucosidase           |                       |             |             |         | An08g08240 | 38077     |
| 3.2.1.21  | $\beta$ -glucosidase           |                       |             |             |         | An11g06080 | 208871    |
| 3.2.1.21  | $\beta$ -glucosidase           |                       |             |             |         | An11g06090 | N/A       |
| 3.2.1.21  | $\beta$ -glucosidase           |                       |             |             |         | An14g01770 | 210981    |
| 3.2.1.21  | $\beta$ -glucosidase           |                       |             |             |         | An15g01890 | 182309    |
| 3.2.1.21  | $\beta$ -glucosidase           |                       |             |             |         | An15g04800 | 181816    |
| 3.2.1.21  | $\beta$ -glucosidase           |                       |             |             |         | An17g00520 | 129891    |
| 3.2.1.21  | $\beta$ -glucosidase           | [31–36,137]           |             | <i>bgl1</i> | A2RAL4  | An18g03570 | 56782     |
| 3.2.1.23  | $\beta$ -galactosidase         |                       |             |             |         | An01g10350 | 46429     |
| 3.2.1.23  | $\beta$ -galactosidase         |                       |             |             |         | An06g00290 | 177434    |
| 3.2.1.23  | $\beta$ -galactosidase         |                       |             |             |         | An07g04420 | 180727    |
| 3.2.1.23  | $\beta$ -galactosidase         |                       |             |             |         | An14g05820 | 41910     |
| 3.2.1.23  | $\beta$ -galactosidase         | [26,161]              |             | <i>lacA</i> | P29853  | An01g12150 | 51764     |
| 3.1.1.6   | Acetyl esterase                |                       |             |             |         | An02g02540 | N/A       |

Table 7: Enzymatic activities required for the degradation of insoluble galactoglucomannan by *A. niger*. For each isoenzyme, putative or characterized, is noted literature references and the gene ID in the sequencings of *A. niger* CBS 513.88 and ATCC 1015. The list of necessary enzymes is gathered from the work by [19].

| EC number | Name                           | Gene characterization | Specificity | Gene        | Uniprot | CBS 513.88 | ATCC 1015 |
|-----------|--------------------------------|-----------------------|-------------|-------------|---------|------------|-----------|
| 3.2.1.78  | Endo-1,4- $\beta$ -D-mannanase | [22]                  | [22]        |             |         | An05g01320 | 50378     |
| 3.2.1.78  | Endo-1,4- $\beta$ -D-mannanase |                       |             |             |         | An15g07760 | 40875     |
| 3.2.1.25  | $\beta$ -mannosidase           |                       |             |             |         | An01g06630 | 172587    |
| 3.2.1.25  | $\beta$ -mannosidase           | [23–25]               | [23,24]     | <i>mndA</i> | Q9UUZ3  | An11g06540 | 138876    |
| 3.2.1.22  | $\alpha$ -galactosidase        | [24,26]               | [24]        | <i>aglC</i> | Q9UUZ4  | An09g00260 | 212736    |
| 3.2.1.22  | $\alpha$ -galactosidase        |                       |             |             |         | An01g01320 | 172232    |
| 3.2.1.22  | $\alpha$ -galactosidase        | [26,27]               |             | <i>aglB</i> | Q9Y865  | An02g11150 | 207264    |
| 3.2.1.22  | $\alpha$ -galactosidase        | [26,28,29]            |             | <i>aglA</i> | A2QL72  | An06g00170 | 37736     |
| 3.2.1.22  | $\alpha$ -galactosidase        |                       |             |             |         | An11g06330 | 39180     |
| 3.2.1.22  | $\alpha$ -galactosidase        |                       |             |             |         | An14g01800 | 185285    |
| 3.2.1.21  | $\beta$ -glucosidase           |                       |             |             |         | An03g03740 | 213437    |
| 3.2.1.21  | $\beta$ -glucosidase           |                       |             |             |         | An03g05330 | 44520     |
| 3.2.1.21  | $\beta$ -glucosidase           |                       |             |             |         | An04g03170 | 131747    |
| 3.2.1.21  | $\beta$ -glucosidase           |                       |             |             |         | An06g02040 | 176601    |
| 3.2.1.21  | $\beta$ -glucosidase           |                       |             |             |         | An07g07630 | 139037    |
| 3.2.1.21  | $\beta$ -glucosidase           |                       |             |             |         | An07g09760 | N/A       |
| 3.2.1.21  | $\beta$ -glucosidase           |                       |             |             |         | An08g08240 | 38077     |
| 3.2.1.21  | $\beta$ -glucosidase           |                       |             |             |         | An11g06080 | 208871    |
| 3.2.1.21  | $\beta$ -glucosidase           |                       |             |             |         | An11g06090 | N/A       |
| 3.2.1.21  | $\beta$ -glucosidase           |                       |             |             |         | An14g01770 | 210981    |
| 3.2.1.21  | $\beta$ -glucosidase           |                       |             |             |         | An15g01890 | 182309    |
| 3.2.1.21  | $\beta$ -glucosidase           |                       |             |             |         | An15g04800 | 181816    |
| 3.2.1.21  | $\beta$ -glucosidase           |                       |             |             |         | An17g00520 | 129891    |
| 3.2.1.21  | $\beta$ -glucosidase           | [30–36,137]           |             | <i>bgl1</i> | A2RAL4  | An18g03570 | 56782     |

Table 8: Enzymatic activities required for the degradation of smooth pectin by *A. niger*. For each isoenzyme, putative or characterized, is noted literature references and the gene ID in the sequencings of *A. niger* CBS 513.88 and ATCC 1015. Gene names in parentheses are genes that have not been characterized with classical molecular biological techniques, but identified from their expression profiles and sequence information. The list of necessary enzymes is gathered from the work by [19].

| EC number | Name                     | Gene characterization          | Specificity      | Gene          | Uniprot | CBS 513.88 | ATCC 1015 |
|-----------|--------------------------|--------------------------------|------------------|---------------|---------|------------|-----------|
| 4.2.2.2   | pectate lyase A          | [5,97]                         | [97]             | <i>plyA</i>   | Q9C2Z0  | An10g00870 | 45021     |
| 4.2.2.10  | pectin lyase             | [5,133,141,164,172,192]        | [207]            | <i>pelA</i>   | Q01172  | An14g04370 | 41815     |
| 4.2.2.10  | pectin lyase             |                                |                  |               |         | An15g07160 | 210387    |
| 4.2.2.10  | pectin lyase             | [5,131,133]                    |                  | <i>pelD</i>   | P22864  | An19g00270 | 55212     |
| 4.2.2.10  | pectin lyase             |                                |                  |               |         | An11g04030 | 208760    |
| 4.2.2.10  | pectin lyase             | [5,163,215]                    |                  | <i>pelB</i>   | Q00205  | An03g00190 | 45821     |
| 3.2.1.67  | exo-poly-D-galacturonase | [6]                            |                  | <i>(rgxA)</i> |         | An01g14650 | 172236    |
| 3.2.1.67  | exo-poly-D-galacturonase | [6]                            |                  | <i>(rgxB)</i> |         | An03g02080 | 194461    |
| 3.2.1.67  | exo-poly-D-galacturonase | [6]                            |                  | <i>(pgxB)</i> |         | An03g06740 | 191158    |
| 3.2.1.67  | exo-poly-D-galacturonase | [6]                            |                  | <i>(pgxA)</i> |         | An11g04040 | 178172    |
| 3.2.1.67  | exo-poly-D-galacturonase | [5,6]                          |                  | <i>(pgaX)</i> |         | An12g07500 | 42184     |
| 3.2.1.67  | exo-poly-D-galacturonase | [6]                            |                  | <i>(rgxC)</i> |         | An18g04810 | 42917     |
| 3.2.1.15  | endo-Polygalacturonase   | [5,104,212]                    | [98,179]         | <i>pgaI</i>   | P26213  | An01g11520 | 141677    |
| 3.2.1.15  | endo-Polygalacturonase   | [5,182]                        | [98]             | <i>pgaE</i>   | O42809  | An01g14670 | 46255     |
| 3.2.1.15  | endo-Polygalacturonase   | [5,181,224]                    | [181]            | <i>pgaB</i>   | P26214  | An02g04900 | 52219     |
| 3.2.1.15  | endo-Polygalacturonase   |                                |                  | <i>(pgxC)</i> |         | An02g12450 | 172944    |
| 3.2.1.15  | endo-Polygalacturonase   | [5,106]                        | [98]             | <i>pgaC</i>   | Q12554  | An05g02440 | 43957     |
| 3.2.1.15  | endo-Polygalacturonase   |                                |                  | <i>(rhgC)</i> |         | An06g02070 | 123651    |
| 3.2.1.15  | endo-Polygalacturonase   | [5,183]                        | [183]            | <i>pgaD</i>   | Q9P4W2  | An09g03260 | 50161     |
| 3.2.1.15  | endo-Polygalacturonase   |                                |                  |               |         | An09g05920 | N/A       |
| 3.2.1.15  | endo-Polygalacturonase   | [5,201]                        | [201]            | <i>rhgA</i>   | P87160  | An12g00950 | 189722    |
| 3.2.1.15  | endo-Polygalacturonase   | [5,14,105–107,147,180,194,213] | [98,165,166,179] | <i>pgaII</i>  |         | An15g05370 | 182156    |
| 3.2.1.15  | endo-Polygalacturonase   | [5,181]                        | [181]            | <i>pgaA</i>   |         | An16g06990 | 214598    |
| 3.2.1.15  | rhamnogalacturonase B    | [5,201]                        | [201]            | <i>rhgB</i>   | P87161  | An14g04200 | 211163    |
| 3.1.1.11  | pectin methylesterase    | [5,151,168]                    | [148,165,166]    | <i>pmeA</i>   | A2QHB7  | An03g06310 | 44585     |
| 3.1.1.11  | pectin methylesterase    |                                |                  |               |         | An04g09690 | 214857    |
| 3.1.1.6   | Acetyl esterase          |                                |                  |               |         | An02g02540 | N/A       |

Table 9: Enzymatic activities required for the degradation of xylan by *A. niger*. For each isoenzyme, putative or characterized, is noted literature references and the gene ID in the sequencings of *A. niger* CBS 513.88 and ATCC 1015. The list of necessary enzymes is gathered from the work by [19,59,68,69].

| EC number | Name                            | Gene characterization    | Specificity | Gene                  | Uniprot | CBS 513.88 | ATCC 1015 |
|-----------|---------------------------------|--------------------------|-------------|-----------------------|---------|------------|-----------|
| 3.2.1.8   | Endo-(1,4)- $\beta$ -xylanase   |                          |             |                       |         | An01g14600 | 171269    |
| 3.2.1.8   | Endo-(1,4)- $\beta$ -xylanase   | [158,209]                |             | <i>xynA</i>           | P55329  | An03g00940 | 57436     |
| 3.2.1.8   | Endo-(1,4)- $\beta$ -xylanase   |                          |             |                       |         | An11g03120 | 38924     |
| 3.2.1.8   | Endo-(1,4)- $\beta$ -xylanase   | [136,203]                |             | <i>exlA</i>           |         | An14g07390 | N/A       |
| 3.2.1.8   | Endo-(1,4)- $\beta$ -xylanase   |                          |             |                       |         | An15g04550 | 183088    |
| 3.2.1.8   | Endo-(1,4)- $\beta$ -xylanase   | [41,152,159,210]         | [159]       | <i>xynB/xlnB/xylB</i> | P55330  | An01g00780 | 52071     |
| 3.2.1.37  | Xylan 1,4- $\beta$ -xylosidase  | [41,109,211]             | [211]       | <i>xlnD</i>           | O00089  | An01g09960 | 205670    |
| 3.2.1.37  | Xylan 1,4- $\beta$ -xylosidase  |                          |             |                       |         | An02g00140 | 174379    |
| 3.2.1.37  | Xylan 1,4- $\beta$ -xylosidase  |                          |             |                       |         | An08g01900 | 47677     |
| 3.2.1.55  | $\alpha$ -L-arabinofuranosidase | [5,10,11,39,45,47,49]    | [77,186]    | <i>abfA</i>           | P42254  | An01g00330 | 206387    |
| 3.2.1.55  | $\alpha$ -L-arabinofuranosidase | [41,124]                 | [156]       | <i>axhA</i>           | P79019  | An03g00960 | 55136     |
| 3.2.1.55  | $\alpha$ -L-arabinofuranosidase |                          |             |                       |         | An08g01710 | 38549     |
| 3.2.1.55  | $\alpha$ -L-arabinofuranosidase | [5,10,39,41,45,46,48,49] |             | <i>abfB</i>           | P42255  | An15g02300 | 200605    |
| 3.2.1.55  | $\alpha$ -L-arabinofuranosidase |                          |             |                       |         | An09g00880 | 131891    |
| 3.2.1.131 | $\alpha$ -glucuronidase         | [41,113]                 |             | <i>aguA</i>           |         | An14g05800 | 56619     |
| 3.1.1.72  | Acetyl xylan esterase           | [41]                     |             | <i>axeA</i>           | A2QZI3  | An09g01010 | 43522     |
| 3.1.1.73  | Ferulic acid esterase A         | [5,40,41,90,112,116,118] | [90,118]    | <i>faeA</i>           | O42807  | An09g00120 | 51662     |
| 3.1.1.73  | Ferulic acid esterase B         | [115,160]                |             | <i>faeB</i>           | Q8WZ18  | N/A        | 51478     |
| 3.1.1.6   | Acetyl esterase                 | [91]                     |             |                       |         | An02g02540 | N/A       |
| 3.2.1.23  | $\beta$ -galactosidase          |                          |             |                       |         | An01g10350 | 46429     |
| 3.2.1.23  | $\beta$ -galactosidase          |                          |             |                       |         | An06g00290 | 177434    |
| 3.2.1.23  | $\beta$ -galactosidase          |                          |             |                       |         | An07g04420 | 180727    |
| 3.2.1.23  | $\beta$ -galactosidase          |                          |             |                       |         | An07g04420 | 180727    |
| 3.2.1.23  | $\beta$ -galactosidase          |                          |             |                       |         | An14g05820 | 41910     |
| 3.2.1.23  | $\beta$ -galactosidase          | [26,161]                 |             | <i>lacA</i>           | P29853  | An01g12150 | 51764     |

Table 10: Enzymatic activities required for the degradation of xyloglucan type XXGG by *A. niger*. For each isoenzyme, putative or characterized, is noted literature references and the gene ID in the sequencings of *A. niger* CBS 513.88 and ATCC 1015. The list of necessary enzymes is gathered from the work by [19,70,71].

| EC number | Name                                                                       | Gene characterization    | Specificity | Gene           | Uniprot | CBS 513.88 | ATCC 1015 |
|-----------|----------------------------------------------------------------------------|--------------------------|-------------|----------------|---------|------------|-----------|
| 3.2.1.-   | $\alpha$ -Xylosidase I                                                     | [170]                    |             |                |         | N/A        | N/A       |
| 3.2.1.-   | $\alpha$ -Xylosidase II                                                    | [171]                    |             |                |         | N/A        | N/A       |
| 3.2.1.23  | $\beta$ -galactosidase                                                     |                          |             |                |         | An01g10350 | 46429     |
| 3.2.1.23  | $\beta$ -galactosidase                                                     |                          |             |                |         | An06g00290 | 177434    |
| 3.2.1.23  | $\beta$ -galactosidase                                                     |                          |             |                |         | An07g04420 | 180727    |
| 3.2.1.23  | $\beta$ -galactosidase                                                     |                          |             |                |         | An14g05820 | 41910     |
| 3.2.1.23  | $\beta$ -galactosidase                                                     | [26,161]                 |             | <i>lacA</i>    | P29853  | An01g12150 | 51764     |
| 3.2.1.4   | endo-glucanase                                                             |                          |             |                |         | An03g01050 | 194447    |
| 3.2.1.4   | endo-glucanase                                                             |                          |             |                |         | An03g05380 | N/A       |
| 3.2.1.4   | endo-glucanase                                                             |                          |             |                |         | An03g05530 | 191511    |
| 3.2.1.4   | endo-glucanase                                                             |                          |             |                |         | An04g08550 | 194765    |
| 3.2.1.4   | endo-glucanase                                                             |                          |             |                |         | An08g01760 | 133986    |
| 3.2.1.4   | endo-glucanase                                                             |                          |             |                |         | An15g04900 | 182430    |
| 3.2.1.4   | endo-glucanase                                                             | [41,139,140,150]         | [134]       | <i>eglA</i>    | O74705  | An14g02760 | 211053    |
| 3.2.1.4   | endo-glucanase                                                             | [41,87,138,150]          | [134]       | <i>eglB</i>    | O74706  | An07g08950 | 209376    |
| 3.2.1.4   | endo-glucanase                                                             | [134]                    | [134]       | <i>eglC</i>    | Q8TFP1  | An01g01870 | 206333    |
| 3.2.1.151 | xyloglucan-specific endo- $\beta$ -1,4-glucanase                           | [169]                    | [169]       | <i>xegl12A</i> | A1XP58  | An01g03340 | 52011     |
| 3.2.1.55  | exo- $\alpha$ -L-arabinofuranosidase (arabinoxylan arabinofuranohydrolase) | [5,11,39,45,47,49]       | [77,186]    | <i>abfA</i>    | P42254  | An01g00330 | 206387    |
| 3.2.1.55  | exo- $\alpha$ -L-arabinofuranosidase (arabinoxylan arabinofuranohydrolase) |                          |             |                |         | An08g01710 | 38549     |
| 3.2.1.55  | exo- $\alpha$ -L-arabinofuranosidase (arabinoxylan arabinofuranohydrolase) | [5,10,39,41,45,46,48,49] |             | <i>abfB</i>    | P42255  | An15g02300 | 200605    |
| 3.2.1.55  | exo- $\alpha$ -L-arabinofuranosidase (arabinoxylan arabinofuranohydrolase) |                          |             |                |         | An09g00880 | 131891    |
| 3.1.1.6   | Acetyl esterase                                                            | [91]                     |             |                |         | An02g02540 | N/A       |
| 3.2.1.37  | Xylan 1,4- $\beta$ -xylosidase                                             | [41,109,211]             |             | <i>xlnD</i>    | O00089  | An01g09960 | 205670    |
| 3.2.1.37  | Xylan 1,4- $\beta$ -xylosidase                                             |                          |             |                |         | An02g00140 | 174379    |

Continues on next page

Continued from last page

| EC number | Name                           | Gene characteri-<br>zation | Specificity | Gene        | Uniprot | CBS 513.88 | ATCC 1015 |
|-----------|--------------------------------|----------------------------|-------------|-------------|---------|------------|-----------|
| 3.2.1.37  | Xylan 1,4- $\beta$ -xylosidase |                            |             |             |         | An08g01900 | 47677     |
| 3.2.1.21  | $\beta$ -glucosidase           |                            |             |             |         | An03g03740 | 213437    |
| 3.2.1.21  | $\beta$ -glucosidase           |                            |             |             |         | An03g05330 | 44520     |
| 3.2.1.21  | $\beta$ -glucosidase           |                            |             |             |         | An04g03170 | 131747    |
| 3.2.1.21  | $\beta$ -glucosidase           |                            |             |             |         | An06g02040 | 176601    |
| 3.2.1.21  | $\beta$ -glucosidase           |                            |             |             |         | An07g07630 | 139037    |
| 3.2.1.21  | $\beta$ -glucosidase           |                            |             |             |         | An07g09760 | N/A       |
| 3.2.1.21  | $\beta$ -glucosidase           |                            |             |             |         | An08g08240 | 38077     |
| 3.2.1.21  | $\beta$ -glucosidase           |                            |             |             |         | An11g06080 | 208871    |
| 3.2.1.21  | $\beta$ -glucosidase           |                            |             |             |         | An11g06090 | N/A       |
| 3.2.1.21  | $\beta$ -glucosidase           |                            |             |             |         | An14g01770 | 210981    |
| 3.2.1.21  | $\beta$ -glucosidase           |                            |             |             |         | An15g01890 | 182309    |
| 3.2.1.21  | $\beta$ -glucosidase           |                            |             |             |         | An15g04800 | 181816    |
| 3.2.1.21  | $\beta$ -glucosidase           |                            |             |             |         | An17g00520 | 129891    |
| 3.2.1.21  | $\beta$ -glucosidase           | [30-36,137,223]            |             | <i>bgl1</i> | A2RAL4  | An18g03570 | 56782     |

Table 11: Enzymatic activities required for the degradation of xyloglucan type XXXG by *A. niger*. For each isoenzyme, putative or characterized, is noted literature references and the gene ID in the sequencings of *A. niger* CBS 513.88 and ATCC 1015. The list of necessary enzymes is gathered from the work by [19,70,71].

| EC number | Name                                                                       | Gene characteri-<br>zation | Specificity | Gene          | Uniprot | CBS 513.88 | ATCC 1015 |
|-----------|----------------------------------------------------------------------------|----------------------------|-------------|---------------|---------|------------|-----------|
| 3.2.1.-   | $\alpha$ -Xylosidase I                                                     | [170]                      |             |               |         | N/A        | N/A       |
| 3.2.1.-   | $\alpha$ -Xylosidase II                                                    | [171]                      |             |               |         | N/A        | N/A       |
| 3.2.1.23  | $\beta$ -galactosidase                                                     |                            |             |               |         | An01g10350 | 46429     |
| 3.2.1.23  | $\beta$ -galactosidase                                                     |                            |             |               |         | An06g00290 | 177434    |
| 3.2.1.23  | $\beta$ -galactosidase                                                     |                            |             |               |         | An07g04420 | 180727    |
| 3.2.1.23  | $\beta$ -galactosidase                                                     |                            |             |               |         | An14g05820 | 41910     |
| 3.2.1.23  | $\beta$ -galactosidase                                                     | [26,161]                   |             | <i>lacA</i>   | P29853  | An01g12150 | 51764     |
| 3.2.1.4   | endo-glucanase                                                             |                            |             |               |         | An03g01050 | 194447    |
| 3.2.1.4   | endo-glucanase                                                             |                            |             |               |         | An03g05380 | N/A       |
| 3.2.1.4   | endo-glucanase                                                             |                            |             |               |         | An03g05530 | 191511    |
| 3.2.1.4   | endo-glucanase                                                             |                            |             |               |         | An04g08550 | 194765    |
| 3.2.1.4   | endo-glucanase                                                             |                            |             |               |         | An08g01760 | 133986    |
| 3.2.1.4   | endo-glucanase                                                             |                            |             |               |         | An15g04900 | 182430    |
| 3.2.1.4   | endo-glucanase                                                             | [41,139,140,150]           | [134]       | <i>eglA</i>   | O74705  | An14g02760 | 211053    |
| 3.2.1.4   | endo-glucanase                                                             | [41,87,138,150]            | [134]       | <i>eglB</i>   | O74706  | An07g08950 | 209376    |
| 3.2.1.4   | endo-glucanase                                                             | [134]                      | [134]       | <i>eglC</i>   | Q8TFP1  | An01g01870 | 206333    |
| 3.2.1.151 | xyloglucan-specific endo- $\beta$ -1,4-glucanase                           | [169]                      | [169]       | <i>xeg12A</i> | A1XP58  | An01g03340 | 52011     |
|           | 1,2- $\alpha$ -L-fucosidase                                                | [95]                       | [95]        | <i>fucA</i>   |         |            |           |
| 3.2.1.55  | exo- $\alpha$ -L-arabinofuranosidase (arabinoxylan arabinofuranohydrolase) | [5,11,39,45,47,49]         | [77,186]    | <i>abfA</i>   | P42254  | An01g00330 | 206387    |
| 3.2.1.55  | exo- $\alpha$ -L-arabinofuranosidase (arabinoxylan arabinofuranohydrolase) |                            |             |               |         | An08g01710 | 38549     |
| 3.2.1.55  | exo- $\alpha$ -L-arabinofuranosidase (arabinoxylan arabinofuranohydrolase) | [5,10,39,41,45,46,48,49]   |             | <i>abfB</i>   | P42255  | An15g02300 | 200605    |
| 3.2.1.55  | exo- $\alpha$ -L-arabinofuranosidase (arabinoxylan arabinofuranohydrolase) |                            |             |               |         | An09g00880 | 131891    |
| 3.1.1.6   | Acetyl esterase                                                            | [91]                       |             |               |         | An02g02540 | N/A       |
| 3.2.1.37  | Xylan 1,4- $\beta$ -xylosidase                                             | [41,109,211]               |             | <i>xlnD</i>   | O00089  | An01g09960 | 205670    |
| 3.2.1.37  | Xylan 1,4- $\beta$ -xylosidase                                             |                            |             |               |         | An02g00140 | 174379    |
| 3.2.1.37  | Xylan 1,4- $\beta$ -xylosidase                                             |                            |             |               |         | An08g01900 | 47677     |
| 3.2.1.21  | $\beta$ -glucosidase                                                       |                            |             |               |         | An03g03740 | 213437    |
| 3.2.1.21  | $\beta$ -glucosidase                                                       |                            |             |               |         | An03g05330 | 44520     |
| 3.2.1.21  | $\beta$ -glucosidase                                                       |                            |             |               |         | An04g03170 | 131747    |
| 3.2.1.21  | $\beta$ -glucosidase                                                       |                            |             |               |         | An06g02040 | 176601    |
| 3.2.1.21  | $\beta$ -glucosidase                                                       |                            |             |               |         | An07g07630 | 139037    |
| 3.2.1.21  | $\beta$ -glucosidase                                                       |                            |             |               |         | An07g09760 | N/A       |
| 3.2.1.21  | $\beta$ -glucosidase                                                       |                            |             |               |         | An08g08240 | 38077     |
| 3.2.1.21  | $\beta$ -glucosidase                                                       |                            |             |               |         | An11g06080 | 208871    |
| 3.2.1.21  | $\beta$ -glucosidase                                                       |                            |             |               |         | An11g06090 | N/A       |
| 3.2.1.21  | $\beta$ -glucosidase                                                       |                            |             |               |         | An14g01770 | 210981    |
| 3.2.1.21  | $\beta$ -glucosidase                                                       |                            |             |               |         | An15g01890 | 182309    |
| 3.2.1.21  | $\beta$ -glucosidase                                                       |                            |             |               |         | An15g04800 | 181816    |
| 3.2.1.21  | $\beta$ -glucosidase                                                       |                            |             |               |         | An17g00520 | 129891    |
| 3.2.1.21  | $\beta$ -glucosidase                                                       | [30-36,137,223]            |             | <i>bgl1</i>   | A2RAL4  | An18g03570 | 56782     |
| 3.2.1.22  | $\alpha$ -galactosidase                                                    | [24,26]                    | [24]        | <i>aglC</i>   | Q9UUZ4  | An09g00260 | 212736    |
| 3.2.1.22  | $\alpha$ -galactosidase                                                    |                            |             |               |         | An01g01320 | 172232    |

Continues on next page

| Continued from last page |                         |                            |             |             |         |            |           |
|--------------------------|-------------------------|----------------------------|-------------|-------------|---------|------------|-----------|
| EC number                | Name                    | Gene characteri-<br>zation | Specificity | Gene        | Uniprot | CBS 513.88 | ATCC 1015 |
| 3.2.1.22                 | $\alpha$ -galactosidase | [26,27]                    |             | <i>aglB</i> | Q9Y865  | An02g11150 | 207264    |
| 3.2.1.22                 | $\alpha$ -galactosidase | [26,28,29]                 |             | <i>aglA</i> | A2QL72  | An06g00170 | 37736     |
| 3.2.1.22                 | $\alpha$ -galactosidase |                            |             |             |         | An11g06330 | 39180     |
| 3.2.1.22                 | $\alpha$ -galactosidase |                            |             |             |         | An14g01800 | 185285    |

Table 12: Enzymatic activities required for the degradation of xylogalacturonan by *A. niger*. For each isoenzyme, putative or characterized, is noted literature references and the gene ID in the sequencings of *A. niger* CBS 513.88 and ATCC 1015. Gene names in parentheses are genes that have not been characterized with classical molecular biological techniques, but identified from their expression profiles and sequence information. The list of necessary enzymes is gathered from the work by [19,64–67].

| EC number | Name                           | Gene characteri-<br>zation         | Specificity      | Gene          | Uniprot | CBS 513.88 | ATCC 1015 |
|-----------|--------------------------------|------------------------------------|------------------|---------------|---------|------------|-----------|
| 4.2.2.2   | pectate lyase A                | [5,97]                             | [97]             | <i>plyA</i>   | Q9C2Z0  | An10g00870 | 45021     |
| 4.2.2.10  | pectin lyase                   | [5,133,141,164,<br>172,192]        | [207]            | <i>pelA</i>   | Q01172  | An14g04370 | 41815     |
| 4.2.2.10  | pectin lyase                   |                                    |                  |               |         | An15g07160 | 210387    |
| 4.2.2.10  | pectin lyase                   | [5,131,133]                        |                  | <i>pelD</i>   | P22864  | An19g00270 | 55212     |
| 4.2.2.10  | pectin lyase                   |                                    |                  |               |         | An11g04030 | 208760    |
| 4.2.2.10  | pectin lyase                   | [5,163,215]                        |                  | <i>pelB</i>   | Q00205  | An03g00190 | 45821     |
| 3.2.1.67  | exo-poly-D-galacturonase       | [6]                                |                  | <i>(rgxA)</i> |         | An01g14650 | 172236    |
| 3.2.1.67  | exo-poly-D-galacturonase       | [6]                                |                  | <i>(rgxB)</i> |         | An03g02080 | 194461    |
| 3.2.1.67  | exo-poly-D-galacturonase       | [6]                                |                  | <i>(pgxB)</i> |         | An03g06740 | 191158    |
| 3.2.1.67  | exo-poly-D-galacturonase       | [6]                                |                  | <i>(pgxA)</i> |         | An11g04040 | 178172    |
| 3.2.1.67  | exo-poly-D-galacturonase       | [5,6]                              |                  | <i>(pgaX)</i> |         | An12g07500 | 42184     |
| 3.2.1.67  | exo-poly-D-galacturonase       | [6]                                |                  | <i>(rgxC)</i> |         | An18g04810 | 42917     |
| 3.2.1.15  | endo-Polygalacturonase         | [5,104,212]                        | [98,179]         | <i>pgaI</i>   | P26213  | An01g11520 | 141677    |
| 3.2.1.15  | endo-Polygalacturonase         | [5,182]                            | [98]             | <i>pgaE</i>   | O42809  | An01g14670 | 46255     |
| 3.2.1.15  | endo-Polygalacturonase         | [5,181,224]                        | [181]            | <i>pgaB</i>   | P26214  | An02g04900 | 52219     |
| 3.2.1.15  | endo-Polygalacturonase         |                                    |                  | <i>(pgxC)</i> |         | An02g12450 | 172944    |
| 3.2.1.15  | endo-Polygalacturonase         | [5,106]                            | [98]             | <i>pgaC</i>   | Q12554  | An05g02440 | 43957     |
| 3.2.1.15  | endo-Polygalacturonase         |                                    |                  | <i>(rhgC)</i> |         | An06g02070 | 123651    |
| 3.2.1.15  | endo-Polygalacturonase         | [5,183]                            | [183]            | <i>pgaD</i>   | Q9P4W2  | An09g03260 | 50161     |
| 3.2.1.15  | endo-Polygalacturonase         |                                    |                  |               |         | An09g05920 | N/A       |
| 3.2.1.15  | endo-Polygalacturonase         | [5,201]                            | [201]            | <i>rhgA</i>   | P87160  | An12g00950 | 189722    |
| 3.2.1.15  | endo-Polygalacturonase         | [5,14,105–107,<br>147,180,194,213] | [98,165,166,179] | <i>pgalI</i>  |         | An15g05370 | 182156    |
| 3.2.1.15  | endo-Polygalacturonase         | [5,181]                            | [181]            | <i>pgaA</i>   |         | An16g06990 | 214598    |
| 3.2.1.15  | rhamnogalacturonase B          | [5,201]                            | [201]            | <i>rhgB</i>   | P87161  | An14g04200 | 211163    |
| 3.2.1.37  | Xylan 1,4- $\beta$ -xylosidase | [41,109,211]                       |                  | <i>xlnD</i>   | O00089  | An01g09960 | 205670    |
| 3.2.1.37  | Xylan 1,4- $\beta$ -xylosidase |                                    |                  |               |         | An02g00140 | 174379    |
| 3.2.1.37  | Xylan 1,4- $\beta$ -xylosidase |                                    |                  |               |         | An08g01900 | 47677     |

Table 13: Enzymatic activities required for the degradation of arabinogalactan I by *A. niger*. For each isoenzyme, putative or characterized, is noted literature references and the gene ID in the sequencings of *A. niger* CBS 513.88 and ATCC 1015. The list of necessary enzymes is gathered from the work by [12,72,73].

| EC number | Name                                 | Gene characterization    | Specificity | Gene        | Uniprot | CBS 513.88 | ATCC 1015 |
|-----------|--------------------------------------|--------------------------|-------------|-------------|---------|------------|-----------|
| 3.2.1.89  | $\beta$ -1,4-endogalactanase         |                          |             |             |         | An16g06590 | N/A       |
| 3.2.1.89  | $\beta$ -1,4-endogalactanase         | [12,221]                 | [12,221]    | <i>galA</i> | Q8X168  | An18g05940 | 187227    |
| 3.2.1.23  | $\beta$ -galactosidase               |                          |             |             |         | An01g10350 | 46429     |
| 3.2.1.23  | $\beta$ -galactosidase               |                          |             |             |         | An06g00290 | 177434    |
| 3.2.1.23  | $\beta$ -galactosidase               |                          |             |             |         | An07g04420 | 180727    |
| 3.2.1.23  | $\beta$ -galactosidase               |                          |             |             |         | An14g05820 | 41910     |
| 3.2.1.23  | $\beta$ -galactosidase               | [26,161]                 |             | <i>lacA</i> | P29853  | An01g12150 | 51764     |
| 3.2.1.55  | exo- $\alpha$ -L-arabinofuranosidase | [5,10,11,39,45,47,49]    | [77,186]    | <i>abfA</i> | P42254  | An01g00330 | 206387    |
| 3.2.1.55  | exo- $\alpha$ -L-arabinofuranosidase |                          |             |             |         | An08g01710 | 38549     |
| 3.2.1.55  | exo- $\alpha$ -L-arabinofuranosidase | [5,10,39,41,45,46,48,49] | [77,78,193] | <i>abfB</i> | P42255  | An15g02300 | 200605    |
| 3.2.1.55  | exo- $\alpha$ -L-arabinofuranosidase |                          |             |             |         | An09g00880 | 131891    |
| 3.2.1.99  | endo-1,5- $\alpha$ -L-arabinanase    |                          |             |             |         | An02g01400 | 134398    |
| 3.2.1.99  | endo-1,5- $\alpha$ -L-arabinanase    |                          |             |             |         | An02g10550 | 197735    |
| 3.2.1.99  | endo-1,5- $\alpha$ -L-arabinanase    | [5,45,49,119]            |             | <i>abnA</i> | P42256  | An09g01190 | 203143    |
| 3.2.1.99  | endo-1,5- $\alpha$ -L-arabinanase    |                          |             |             |         | An16g02730 | 184195    |

Table 14: Enzymatic activities required for the degradation of arabinogalactan II by *A. niger*. For each isoenzyme, putative or characterized, is noted literature references and the gene ID in the sequencings of *A. niger* CBS 513.88 and ATCC 1015. The list of necessary enzymes is gathered from the work by [12,72,74,75].

| EC number | Name                                 | Gene characterization    | Specificity | Gene        | Uniprot | CBS 513.88 | ATCC 1015 |
|-----------|--------------------------------------|--------------------------|-------------|-------------|---------|------------|-----------|
| 3.2.1.31  | $\beta$ -glucuronidase               |                          |             |             |         | An01g01260 | 46827     |
| 3.2.1.31  | $\beta$ -glucuronidase               |                          |             |             |         | An05g02410 | 189620    |
|           | endo- $\beta$ -1,3-galactanase       |                          |             |             |         | N/A        | N/A       |
|           | endo- $\beta$ -1,6-galactanase       |                          |             |             |         | N/A        | N/A       |
| 3.2.1.55  | exo- $\alpha$ -L-arabinofuranosidase | [5,10,11,39,45,47,49]    | [77,186]    | <i>abfA</i> | P42254  | An01g00330 | 206387    |
| 3.2.1.55  | exo- $\alpha$ -L-arabinofuranosidase |                          |             |             |         | An08g01710 | 38549     |
| 3.2.1.55  | exo- $\alpha$ -L-arabinofuranosidase | [5,10,39,41,45,46,48,49] | [77,78,193] | <i>abfB</i> | P42255  | An15g02300 | 200605    |
| 3.2.1.55  | exo- $\alpha$ -L-arabinofuranosidase |                          |             |             |         | An09g00880 | 131891    |
| 3.2.1.99  | endo-1,5- $\alpha$ -L-arabinanase    |                          |             |             |         | An02g01400 | 134398    |
| 3.2.1.99  | endo-1,5- $\alpha$ -L-arabinanase    |                          |             |             |         | An02g10550 | 197735    |
| 3.2.1.99  | endo-1,5- $\alpha$ -L-arabinanase    | [5,39,45,49,119]         |             | <i>abnA</i> | P42256  | An09g01190 | 203143    |
| 3.2.1.99  | endo-1,5- $\alpha$ -L-arabinanase    |                          |             |             |         | An16g02730 | 184195    |
| 3.2.1.23  | $\beta$ -galactosidase               |                          |             |             |         | An01g10350 | 46429     |
| 3.2.1.23  | $\beta$ -galactosidase               |                          |             |             |         | An06g00290 | 177434    |
| 3.2.1.23  | $\beta$ -galactosidase               |                          |             |             |         | An07g04420 | 180727    |
| 3.2.1.23  | $\beta$ -galactosidase               |                          |             |             |         | An14g05820 | 41910     |
| 3.2.1.23  | $\beta$ -galactosidase               | [26,161]                 |             | <i>lacA</i> | P29853  | An01g12150 | 51764     |



Table 15: Enzymatic activities required for the degradation of arabinan by *A. niger*. For each isoenzyme, putative or characterized, is noted literature references and the gene ID in the sequencings of *A. niger* CBS 513.88 and ATCC 1015. The list of necessary enzymes is gathered from the work by [76,78].

| EC number | Name                                 | Gene characterization    | Specificity | Gene        | Uniprot | CBS 513.88 | ATCC 1015 |
|-----------|--------------------------------------|--------------------------|-------------|-------------|---------|------------|-----------|
| 3.2.1.55  | exo- $\alpha$ -L-arabinofuranosidase | [5,39,45,47,49]          | [77,186]    | <i>abfA</i> | P42254  | An01g00330 | 206387    |
| 3.2.1.55  | exo- $\alpha$ -L-arabinofuranosidase | [5,11,39,45,47,49]       |             |             |         | An08g01710 | 38549     |
| 3.2.1.55  | exo- $\alpha$ -L-arabinofuranosidase | [5,10,39,41,45,46,48,49] |             | <i>abfB</i> | P42255  | An15g02300 | 200605    |
| 3.2.1.55  | exo- $\alpha$ -L-arabinofuranosidase |                          |             |             |         | An09g00880 | 131891    |
| 3.2.1.99  | endo-1,5- $\alpha$ -L-arabinanase    |                          |             |             |         | An02g01400 | 134398    |
| 3.2.1.99  | endo-1,5- $\alpha$ -L-arabinanase    |                          |             |             |         | An02g10550 | 197735    |
| 3.2.1.99  | endo-1,5- $\alpha$ -L-arabinanase    | [5,39,45,49,119]         |             | <i>abnA</i> | P42256  | An09g01190 | 203143    |
| 3.2.1.99  | endo-1,5- $\alpha$ -L-arabinanase    |                          |             |             |         | An16g02730 | 184195    |
|           | none                                 | [19]                     |             |             |         |            | N/A       |
| 3.1.1.73  | Ferulic acid esterase A              | [5,40,41,90,112,116,118] | [90,118]    | <i>faeA</i> | O42807  | An09g00120 | 51662     |
| 3.1.1.73  | Ferulic acid esterase B              | [115,160]                |             | <i>faeB</i> | Q8WZ18  | N/A        | 51478     |

Table 16: Enzymatic activities required for the degradation of rhamnogalacturonan I by *A. niger*. For each isoenzyme, putative or characterized, is noted literature references and the gene ID in the sequencings of *A. niger* CBS 513.88 and ATCC 1015. Gene names in parentheses are genes that have not been characterized with classical molecular biological techniques, but identified from their expression profiles and sequence information. The list of necessary enzymes is gathered from the work by [19,79,80].

| EC number | Name                                                  | Gene characterization          | Specificity      | Gene          | Uniprot | CBS 513.88 | ATCC 1015 |
|-----------|-------------------------------------------------------|--------------------------------|------------------|---------------|---------|------------|-----------|
| No EC     | rhamnogalacturonan hydrolase                          | [5,201]                        |                  | <i>rglA</i>   | Q8NJK5  | An14g01130 | 210947    |
| 4.2.2.2   | pectate lyase A                                       | [5,97]                         | [97]             | <i>plyA</i>   | Q9C2Z0  | An10g00870 | 45021     |
| 4.2.2.10  | pectin lyase                                          | [5,133,141,164,172,192]        | [207]            | <i>pelA</i>   | Q01172  | An14g04370 | 41815     |
| 4.2.2.10  | pectin lyase                                          |                                |                  |               |         | An15g07160 | 210387    |
| 4.2.2.10  | pectin lyase                                          | [5,131,133]                    |                  | <i>pelD</i>   | P22864  | An19g00270 | 55212     |
| 4.2.2.10  | pectin lyase                                          |                                |                  |               |         | An11g04030 | 208760    |
| 4.2.2.10  | pectin lyase                                          | [5,163,215]                    |                  | <i>pelB</i>   | Q00205  | An03g00190 | 45821     |
| 3.2.1.67  | exo-poly-D-galacturonase                              | [6]                            |                  | <i>(rgxA)</i> |         | An01g14650 | 172236    |
| 3.2.1.67  | exo-poly-D-galacturonase                              | [6]                            |                  | <i>(rgxB)</i> |         | An03g02080 | 194461    |
| 3.2.1.67  | exo-poly-D-galacturonase                              | [6]                            |                  | <i>(pgxB)</i> |         | An03g06740 | 191158    |
| 3.2.1.67  | exo-poly-D-galacturonase                              | [6]                            |                  | <i>(pgxA)</i> |         | An11g04040 | 178172    |
| 3.2.1.67  | exo-poly-D-galacturonase                              | [5,6]                          |                  | <i>(pgxA)</i> |         | An12g07500 | 42184     |
| 3.2.1.67  | exo-poly-D-galacturonase                              | [6]                            |                  | <i>(rgxC)</i> |         | An18g04810 | 42917     |
| 3.2.1.15  | endo-Polygalacturonase                                | [5,104,212]                    | [98,179]         | <i>pgaI</i>   | P26213  | An01g11520 | 141677    |
| 3.2.1.15  | endo-Polygalacturonase                                | [5,182]                        | [98]             | <i>pgaE</i>   | O42809  | An01g14670 | 46255     |
| 3.2.1.15  | endo-Polygalacturonase                                | [5,181,224]                    | [181]            | <i>pgaB</i>   | P26214  | An02g04900 | 52219     |
| 3.2.1.15  | endo-Polygalacturonase                                |                                |                  | <i>(pgxC)</i> |         | An02g12450 | 172944    |
| 3.2.1.15  | endo-Polygalacturonase                                | [5,106]                        | [98]             | <i>pgaC</i>   | Q12554  | An05g02440 | 43957     |
| 3.2.1.15  | endo-Polygalacturonase                                |                                |                  | <i>(rhgC)</i> |         | An06g02070 | 123651    |
| 3.2.1.15  | endo-Polygalacturonase                                | [5,183]                        | [183]            | <i>pgaD</i>   | Q9P4W2  | An09g03260 | 50161     |
| 3.2.1.15  | endo-Polygalacturonase                                |                                |                  |               |         | An09g05920 | N/A       |
| 3.2.1.15  | endo-Polygalacturonase                                | [5,201]                        | [201]            | <i>rhgA</i>   | P87160  | An12g00950 | 189722    |
| 3.2.1.15  | endo-Polygalacturonase                                | [5,14,105-107,147,180,194,213] | [98,165,166,179] | <i>pgaII</i>  |         | An15g05370 | 182156    |
| 3.2.1.15  | endo-Polygalacturonase                                | [5,181]                        | [181]            | <i>pgaA</i>   |         | An16g06990 | 214598    |
| 3.2.1.15  | rhamnogalacturonase B                                 | [5,201]                        | [201]            | <i>rhgB</i>   | P87161  | An14g04200 | 211163    |
| No EC     | rhamnogalacturonan acetyltransferase ( <i>rgaeA</i> ) | [5,19,114]                     |                  | <i>rgaeA</i>  | Q96VT8  | An09g02160 | 189254    |
| 3.2.1.55  | exo- $\alpha$ -L-arabinofuranosidase                  | [5,10,11,39,45,47,49]          | [77,186]         | <i>abfA</i>   | P42254  | An01g00330 | 206387    |
| 3.2.1.55  | exo- $\alpha$ -L-arabinofuranosidase                  |                                |                  |               |         | An08g01710 | 38549     |
| 3.2.1.55  | exo- $\alpha$ -L-arabinofuranosidase                  | [5,10,39,41,45,46,49]          |                  | <i>abfB</i>   | P42255  | An15g02300 | 200605    |
| 3.2.1.55  | exo- $\alpha$ -L-arabinofuranosidase                  |                                |                  |               |         | An09g00880 | 131891    |
| 3.2.1.99  | endo 1,5- $\alpha$ -L-arabinanase                     |                                |                  |               |         | An02g01400 | 134398    |
| 3.2.1.99  | endo 1,5- $\alpha$ -L-arabinanase                     |                                |                  |               |         | An02g10550 | 197735    |
| 3.2.1.99  | endo 1,5- $\alpha$ -L-arabinanase                     | [5,39,45,49,119]               |                  | <i>abnA</i>   | P42256  | An09g01190 | 203143    |
| 3.2.1.99  | endo 1,5- $\alpha$ -L-arabinanase                     |                                |                  |               |         | An16g02730 | 184195    |
| No EC     | exo-arabinase                                         | [19]                           |                  |               |         |            | N/A       |
| 3.2.1.23  | $\beta$ -galactosidase                                |                                |                  |               |         | An01g10350 | 46429     |

Continues on next page

| Continued from last page |                              |                          |             |             |         |            |           |
|--------------------------|------------------------------|--------------------------|-------------|-------------|---------|------------|-----------|
| EC number                | Name                         | Gene characterization    | Specificity | Gene        | Uniprot | CBS 513.88 | ATCC 1015 |
| 3.2.1.23                 | $\beta$ -galactosidase       |                          |             |             |         | An06g00290 | 177434    |
| 3.2.1.23                 | $\beta$ -galactosidase       |                          |             |             |         | An07g04420 | 180727    |
| 3.2.1.23                 | $\beta$ -galactosidase       |                          |             |             |         | An14g05820 | 41910     |
| 3.2.1.23                 | $\beta$ -galactosidase       | [26,161]                 |             | <i>lacA</i> | P29853  | An01g12150 | 51764     |
| 3.2.1.89                 | $\beta$ -1,4-endogalactanase |                          |             |             |         | An16g06590 | N/A       |
| 3.2.1.89                 | $\beta$ -1,4-endogalactanase | [12,221]                 | [12,221]    | <i>galA</i> | Q8X168  | An18g05940 | 187227    |
| 3.1.1.73                 | Ferulic acid esterase A      | [5,40,41,90,112,116,118] | [90,118]    | <i>faeA</i> | O42807  | An09g00120 | 51662     |
| 3.1.1.73                 | Ferulic acid esterase B      | [115,160]                |             | <i>faeB</i> | Q8WZ18  | N/A        | 51478     |

Table 17: Literature on *A. niger* carbohydrate-active enzymes that could not be correlated to a specific gene.

| EC number | Name                                                       | Enzyme characterization                      | Specificity       |
|-----------|------------------------------------------------------------|----------------------------------------------|-------------------|
| 3.1.1.11  | pectin methylesterase                                      |                                              | [206]             |
| 3.1.1.6   | Acetyl esterase                                            | [157,167]                                    | [157]             |
| 3.1.1.73  | cinnamate esterase                                         | [96]                                         |                   |
| 3.2.1.-   | Xylosidase                                                 | [170,171]                                    |                   |
| 3.2.1.131 | $\alpha$ -glucuronidase                                    | [153,204]                                    | [153]             |
| 3.2.1.15  | endo-Polygalacturonase                                     | [110,149]                                    | [82,149,199]      |
| 3.2.1.21  | $\beta$ -glucosidase                                       | [84,89,123,205,219,220,222,225]              | [205,123,219,220] |
| 3.2.1.22  | $\alpha$ -galactosidase                                    | [83,85,145,200]                              | [145,200]         |
| 3.2.1.23  | $\beta$ -galactosidase                                     | [102,129]                                    |                   |
| 3.2.1.3   | glucoamylase                                               | [122,184]                                    |                   |
| 3.2.1.31  | $\beta$ -glucuronidase                                     | [128]                                        |                   |
| 3.2.1.37  | Xylan 1,4- $\beta$ -xylosidase                             | [108,142,189]                                |                   |
| 3.2.1.4   | endo-glucanase                                             | [198,214]                                    |                   |
| 3.2.1.40  | $\alpha$ -L-rhamnosidase                                   | [162]                                        |                   |
| 3.2.1.55  | $\alpha$ -L-arabinofuranosidase                            | [130,143,144,146,217]                        |                   |
| 3.2.1.67  | exo-poly-D-galacturonase                                   | [135,187]                                    | [82,135,166,190]  |
| 3.2.1.78  | Endo-1,4- $\beta$ -D-mannanase                             | [117,173,188]                                | [173]             |
| 3.2.1.8   | Endo-(1,4)- $\beta$ -xylanase                              | [99,111,120,121,126,127,142,174,195,196,216] | [99,120,174]      |
| 3.2.1.89  | $\beta$ -1,4-endogalactanase                               | [208]                                        | [208]             |
| 3.2.1.91  | Cellulose 1,4- $\beta$ -cellobiosidase (Cellobiohydrolase) | [81,197]                                     |                   |
| 3.2.1.99  | endo 1,5- $\alpha$ -L-arabinanase                          | [186]                                        |                   |
| 4.2.2.10  | pectin lyase                                               |                                              | [82,165]          |
| No EC     | rhamnogalacturonan acetyesterase                           | [77]                                         |                   |
| No EC     | exo- $\beta$ -1,3-galactanase                              | [185]                                        | [185]             |
| No EC     | endo- $\beta$ -1,6-galactanase                             | [103]                                        |                   |

Table 18: Clustering results for genes coding for polysaccharide-acting enzymes. The first two columns are the gene IDs from the two *A. niger* genome sequencings. The genes are sorted according to clusters. A short description of the expression pattern is found in the Regulation column, while a summary term for the activity profile of the genes of the cluster is found in the Activity profile column (if one such existed)

| ATCC 1015 | CBS 513.88 | Cluster | Gene                                                                                       | Regulation                                               | Activity profile                                                 |
|-----------|------------|---------|--------------------------------------------------------------------------------------------|----------------------------------------------------------|------------------------------------------------------------------|
| 122069    | An09g03110 | 1       | $\alpha$ -amylase                                                                          | Up on mono-sugars and starch                             | Galactomannan and insoluble galactoglucoman degradation          |
| 123981    | An11g07660 | 1       | candidate membrane bound $\beta$ -glycosidase                                              | Up on mono-sugars and starch                             | Galactomannan and insoluble galactoglucoman degradation          |
| 184195    | An16g02730 | 1       | endo 1,5- $\alpha$ -L-arabinanase                                                          | Up on mono-sugars and starch                             | Galactomannan and insoluble galactoglucoman degradation          |
| 211595    | An12g04610 | 1       | candidate endo-1,4-glucanase                                                               | Up on mono-sugars and starch                             | Galactomannan and insoluble galactoglucoman degradation          |
| 214608    | An16g06800 | 1       | candidate endoglucanase; C-terminal CBM1 module                                            | Up on mono-sugars and starch                             | Galactomannan and insoluble galactoglucoman degradation          |
| 38077     | An08g08240 | 1       | $\beta$ -glucosidase                                                                       | Up on mono-sugars and starch                             | Galactomannan and insoluble galactoglucoman degradation          |
| 39180     | An11g06330 | 1       | $\alpha$ -galactosidase                                                                    | Up on mono-sugars and starch                             | Galactomannan and insoluble galactoglucoman degradation          |
| 40875     | An15g07760 | 1       | Endo-1,4- $\beta$ -D-mannanase                                                             | Up on mono-sugars and starch                             | Galactomannan and insoluble galactoglucoman degradation          |
| 44520     | An03g05330 | 1       | $\beta$ -glucosidase                                                                       | Up on mono-sugars and starch                             | Galactomannan and insoluble galactoglucoman degradation          |
| 46827     | An01g01260 | 1       | $\beta$ -glucuronidase                                                                     | Up on mono-sugars and starch                             | Galactomannan and insoluble galactoglucoman degradation          |
| 182162    | An15g07800 | 2       | $\alpha$ -amylase                                                                          | Up on mono-sugars and starch                             | GH family 13.                                                    |
| 191511    | An03g05530 | 2       | endo-glucanase                                                                             | Up on mono-sugars and starch                             | GH family 13.                                                    |
| 40878     | An15g07810 | 2       | candidate $\alpha$ -1,3-glucan synthase                                                    | Up on mono-sugars and starch                             | GH family 13.                                                    |
| 54378     | An09g03070 | 2       | candidate $\alpha$ -1,3-glucan synthase                                                    | Up on mono-sugars and starch                             | GH family 13.                                                    |
| 55204     | An04g09890 | 2       | membrane-bound $\alpha$ -1,3-glucan synthase (agsA);                                       | Up on mono-sugars and starch                             | GH family 13.                                                    |
| 128077    | An07g04930 | 3       | candidate membrane-bound $\alpha$ -glycosidase distantly related to endoarabinanases       | Down on xylan                                            | No clear profile                                                 |
| 45304     | An04g06930 | 3       | $\alpha$ -amylase                                                                          | Down on xylan                                            | No clear profile                                                 |
| 50378     | An05g01320 | 3       | Endo-1,4- $\beta$ -D-mannanase                                                             | Down on xylan                                            | No clear profile                                                 |
| 53797     | An14g02670 | 3       | candidate endoglucanase; C-terminal CBM1 module                                            | Down on xylan                                            | No clear profile                                                 |
| 178393    | An11g06320 | 4       | endo-rhamnogalacturonase                                                                   | No clear regulation                                      | No clear profile                                                 |
| 180922    | An07g01000 | 4       | endo-rhamnogalacturonase                                                                   | No clear regulation                                      | No clear profile                                                 |
| 210233    | An15g04570 | 4       | candidate $\beta$ -glycosidase distantly related to endoglucanases; C-terminal CBM1 module | No clear regulation                                      | No clear profile                                                 |
| 52219     | An02g04900 | 4       | endo-Polygalacturonase ( <i>PgaB</i> )                                                     | No clear regulation                                      | No clear profile                                                 |
| 119858    | An01g10930 | 5       | candidate $\alpha$ -glucosidase                                                            | Up on starch and glucose                                 | Starch-degradation                                               |
| 140567    | An11g03340 | 5       | $\alpha$ -amylase                                                                          | Up on starch and glucose                                 | Starch-degradation                                               |
| 181816    | An15g04800 | 5       | $\beta$ -glucosidase                                                                       | Up on starch and glucose                                 | Starch-degradation                                               |
| 213597    | An03g06550 | 5       | glucoamylase<br>glucosidase/amyloglucosidase) ( <i>glaA</i> )                              | Up on starch and glucose<br>(exo-1,4-<br>( <i>glaA</i> ) | Starch-degradation                                               |
| 214233    | An04g06920 | 5       | $\alpha$ -glucosidase ( <i>aglA/aguI</i> )                                                 | Up on starch and glucose                                 | Starch-degradation                                               |
| 206445    | An02g00850 | 6       | glucoamylase<br>glucosidase/amyloglucosidase)                                              | Up on glucose and starch<br>(exo-1,4-<br>( <i>glaA</i> ) | $\alpha$ and $\beta$ -glucan degradation and the pectin-backbone |

Continues on next page

| ATCC 1015 | CBS 513.88 | Cluster | Gene                                                                                                      | Regulation                                  | Gene profile                                                     |
|-----------|------------|---------|-----------------------------------------------------------------------------------------------------------|---------------------------------------------|------------------------------------------------------------------|
| 209376    | An07g08950 | 6       | endo-glucanase ( <i>eglB</i> )                                                                            | Up on glucose and starch                    | $\alpha$ and $\beta$ -glucan degradation and the pectin-backbone |
| 211163    | An14g04200 | 6       | rhamnogalacturonase B ( <i>rhgB</i> )                                                                     | Up on glucose and starch                    | $\alpha$ and $\beta$ -glucan degradation and the pectin-backbone |
| 214598    | An16g06990 | 6       | endo-Polygalacturonase ( <i>pgaA</i> )                                                                    | Up on glucose and starch                    | $\alpha$ and $\beta$ -glucan degradation and the pectin-backbone |
| 37060     | An02g06950 | 6       | glucoamylase<br>glucosidase/amyloglucosidase<br>pectin lyase ( <i>pelB</i> )                              | (exo-1,4-<br>Up on glucose and starch       | $\alpha$ and $\beta$ -glucan degradation and the pectin-backbone |
| 45821     | An03g00190 | 6       | endo-Polygalacturonase ( <i>rhgC</i> )                                                                    | Up on glucose and starch                    | $\alpha$ and $\beta$ -glucan degradation and the pectin-backbone |
| 123651    | An06g02070 | 7       | endo-glucanase                                                                                            | No clear regulation                         | Pectin-backbone degradation                                      |
| 182430    | An15g04900 | 7       | pectin lyase                                                                                              | No clear regulation                         | Pectin-backbone degradation                                      |
| 208760    | An11g04030 | 7       | candidate $\alpha$ -glycosidase related to bacterial $\alpha$ -L-rhamnosidases                            | No clear regulation                         | Pectin-backbone degradation                                      |
| 44977     | An10g00290 | 7       | pectate lyase A ( <i>plyA</i> )                                                                           | No clear regulation                         | Pectin-backbone degradation                                      |
| 45021     | An10g00870 | 7       | endo 1,5- $\alpha$ -L-arabinanase                                                                         | Up on starch                                | Xylan-backbone degradation                                       |
| 134398    | An02g01400 | 8       | endo-Polygalacturonase ( <i>pgaI</i> )                                                                    | Up on starch                                | Xylan-backbone degradation                                       |
| 141677    | An01g11520 | 8       | $\beta$ -mannosidase                                                                                      | Up on starch                                | Xylan-backbone degradation                                       |
| 172587    | An01g06630 | 8       | candidate $\alpha$ -glycosidase related to bacterial $\alpha$ -L-rhamnosidases                            | Up on starch                                | Xylan-backbone degradation                                       |
| 176718    | An08g09140 | 8       | endo-glucanase ( <i>eglC</i> )                                                                            | Up on starch                                | Xylan-backbone degradation                                       |
| 206333    | An01g01870 | 8       | $\alpha$ -glucosidase                                                                                     | Up on starch                                | Xylan-backbone degradation                                       |
| 40261     | An07g00350 | 8       | xyloglucan-specific endo- $\beta$ -1,4-glucanase ( <i>xeg12A</i> )                                        | Up on starch                                | Xylan-backbone degradation                                       |
| 52011     | An01g03340 | 8       | exo-poly-D-galacturonase ( <i>pgxA</i> )                                                                  | Up on starch                                | Xylan-backbone degradation                                       |
| 178172    | An11g04040 | 9       | candidate $\alpha$ -glycosidase                                                                           | Up on starch                                | Xylan-backbone degradation                                       |
| 189911    | An12g03070 | 9       | pectin lyase ( <i>pelD</i> )                                                                              | Up on starch                                | Xylan-backbone degradation                                       |
| 55212     | An19g00270 | 9       | endo-glucanase                                                                                            | Up on xylan, moreso on xylose               | Xylan-active and with two endo-glucanases                        |
| 133986    | An08g01760 | 10      | endo-glucanase ( <i>eglA</i> )                                                                            | Up on xylan, moreso on xylose               | Xylan-active and with two endo-glucanases                        |
| 211053    | An14g02760 | 10      | candidate $\beta$ -glycosidase related to endoglucanases                                                  | Up on xylan, moreso on xylose               | Xylan-active and with two endo-glucanases                        |
| 43784     | An12g02540 | 10      | candidate $\alpha$ -glycosidase related to $\alpha$ -amylases and maltohexaose-forming $\alpha$ -amylases | Up on xylan, moreso on xylose               | Xylan-active and with two endo-glucanases                        |
| 46290     | An01g13610 | 10      | Ferulic acid esterase A ( <i>faeA</i> )                                                                   | Up on xylan, moreso on xylose               | Xylan-active and with two endo-glucanases                        |
| 51662     | An09g00120 | 10      | Endo-(1,4)- $\beta$ -xylanase ( <i>xynB/xlnB/xyfB</i> )                                                   | Up on xylan, moreso on xylose               | Xylan-active and with two endo-glucanases                        |
| 52071     | An01g00780 | 10      | $\beta$ -glucosidase                                                                                      | Up on arabinan, arabinose, xylan and xylose | Xylan exo-activities                                             |
| 176601    | An06g02040 | 11      | Xylan 1,4- $\beta$ -xylosidase ( <i>xlnD</i> )                                                            | Up on arabinan, arabinose, xylan and xylose | Xylan exo-activities                                             |
| 205670    | An01g09960 | 11      | Xylan 1,4- $\beta$ -xylosidase ( <i>aguA</i> )                                                            | Up on arabinan, arabinose, xylan and xylose | Xylan exo-activities                                             |
| 47677     | An08g01900 | 11      | $\alpha$ -glucuronidase ( <i>aguA</i> )                                                                   | Up on arabinan, arabinose, xylan and xylose | Xylan exo-activities                                             |
| 56619     | An14g05800 | 11      | $\alpha$ -L-arabinofuranosidase                                                                           | Up on xylan                                 | No clear profile                                                 |
| 131891    | An09g00880 | 12      | $\alpha$ -amylase                                                                                         | Up on xylan                                 | No clear profile                                                 |
| 188489    | An09g03100 | 12      | rhamnogalacturonan hydrolase ( <i>rglA</i> )                                                              | Up on xylan                                 | No clear profile                                                 |
| 210947    | An14g01130 | 12      | $\alpha$ -galactosidase ( <i>aglC</i> )                                                                   | Up on xylan                                 | No clear profile                                                 |
| 212736    | An09g00260 | 12      | Cellulose 1,4- $\beta$ -cellobiosidase (Cellobioly-drolase)                                               | Up on xylan                                 | No clear profile                                                 |
| 54490     | An12g02220 | 12      | $\beta$ -mannosidase ( <i>mndA</i> )                                                                      | Up on xylan, arabinan and arabinose         | Galactoglucan degradation and arabinofuranosidases               |
| 138876    | An11g06540 | 13      | Endo-(1,4)- $\beta$ -xylanase                                                                             | Up on xylan, arabinan and arabinose         | Galactoglucan degradation and arabinofuranosidases               |
| 183088    | An15g04550 | 13      |                                                                                                           |                                             |                                                                  |

| <b>ATCC 1015</b> | <b>CBS 513.88</b> | <b>Cluster</b> | <b>Gene</b>                                                                                             | <b>Regulation</b>                   | <b>Gene profile</b>                                     |
|------------------|-------------------|----------------|---------------------------------------------------------------------------------------------------------|-------------------------------------|---------------------------------------------------------|
| 185285           | An14g01800        | 13             | $\alpha$ -galactosidase                                                                                 | Up on xylan, arabinan and arabinose | Galactoglucumannan degradation and arabinofuranosidases |
| 194447           | An03g01050        | 13             | endo-glucanase                                                                                          | Up on xylan, arabinan and arabinose | Galactoglucumannan degradation and arabinofuranosidases |
| 200605           | An15g02300        | 13             | $\alpha$ -L-arabinofuranosidase ( <i>abfB</i> )                                                         | Up on xylan, arabinan and arabinose | Galactoglucumannan degradation and arabinofuranosidases |
| 206387           | An01g00330        | 13             | $\alpha$ -L-arabinofuranosidase ( <i>abfA</i> )                                                         | Up on xylan, arabinan and arabinose | Galactoglucumannan degradation and arabinofuranosidases |
| 37673            | An06g02460        | 13             | candidate $\beta$ -glycosidase distantly related to $\beta$ -N-acetylglucosaminidases                   | Up on xylan, arabinan and arabinose | Galactoglucumannan degradation and arabinofuranosidases |
| 43342            | An09g03300        | 13             | related to $\alpha$ -glycosidases                                                                       | Up on xylan, arabinan and arabinose | Galactoglucumannan degradation and arabinofuranosidases |
| 51764            | An01g12150        | 13             | $\beta$ -galactosidase ( <i>lacA</i> )                                                                  | Up on xylan, arabinan and arabinose | Galactoglucumannan degradation and arabinofuranosidases |
| 140573           | An11g02100        | 14             | candidate $\beta$ -glycosidase; related to monoglucanase $\beta$ -glucosidase                           | Up on xylan and arabinan            | Removal of ferulic esters from arabinan and xylan       |
| 41703            | An14g02920        | 14             | related to rhamnogalacturonyl hydrolases                                                                | Up on xylan and arabinan            | Removal of ferulic esters from arabinan and xylan       |
| 49940            | An18g05620        | 14             | candidate $\alpha$ -glycosidase                                                                         | Up on xylan and arabinan            | Removal of ferulic esters from arabinan and xylan       |
| 51478            | An12g10390        | 14             | Ferulic acid esterase B ( <i>faeB</i> )                                                                 | Up on xylan and arabinan            | Removal of ferulic esters from arabinan and xylan       |
| 53702            | An16g00540        | 14             | candidate $\alpha$ -glycosidase distantly related to $\alpha$ -1,2-L-fucosidases                        | Up on xylan and arabinan            | Removal of ferulic esters from arabinan and xylan       |
| 56782            | An18g03570        | 14             | $\beta$ -glucosidase ( <i>pgtI</i> )                                                                    | Up on xylan and arabinan            | Removal of ferulic esters from arabinan and xylan       |
| 122978           | An08g10780        | 15             | candidate $\beta$ -glucosidase related to galactan 1,3- $\beta$ -galactosidase; C-terminal CBM35 module | No clear regulation                 | No clear profile.                                       |
| 46065            | An04g09700        | 15             | endo-xylogalacturonan hydrolase                                                                         | No clear regulation                 | No clear profile.                                       |
| 52928            | An11g03200        | 15             | endo-inulinase ( <i>inuA/inuB</i> )                                                                     | No clear regulation                 | No clear profile.                                       |
| 184037           | An16g02760        | 16             | candidate $\alpha$ -glycosidase distantly related to $\alpha$ -1,2-L-fucosidases                        | Up on arabinose and arabinan        | No clear profile.                                       |
| 212893           | An12g01850        | 16             | candidate $\beta$ -glycosidase related to bacterial $\beta$ -mannosidases                               | Up on arabinose and arabinan        | No clear profile.                                       |
| 38549            | An08g01710        | 16             | $\alpha$ -L-arabinofuranosidase                                                                         | Up on arabinose and arabinan        | No clear profile.                                       |
| 50161            | An09g03260        | 16             | endo-Polygalacturonase ( <i>pgaD</i> )                                                                  | Up on arabinose and arabinan        | No clear profile.                                       |
| 52111            | An02g00610        | 16             | candidate $\beta$ -glycosidase distantly related to $\beta$ -glucuronidases                             | Up on arabinose and arabinan        | No clear profile.                                       |
| 52452            | An02g13240        | 16             | candidate $\alpha$ -glycosidase related to $\alpha$ -glucosidases                                       | Up on arabinose and arabinan        | No clear profile.                                       |
| 182309           | An15g01890        | 17             | $\beta$ -glucosidase                                                                                    | Up on arabinan                      | Cellulose-degradation                                   |
| 210716           | An16g02100        | 17             | candidate $\beta$ -glycosidase                                                                          | Up on arabinan                      | Cellulose-degradation                                   |
| 212915           | An12g02450        | 17             | candidate $\alpha$ -1,3-glucan synthase; N-terminal GH13 module and C-terminal GT5 module               | Up on arabinan                      | Cellulose-degradation                                   |
| 45461            | An16g09090        | 17             | candidate membrane bound $\beta$ -glycosidase related to $\beta$ -N-acetylglucosaminidase               | Up on arabinan                      | Cellulose-degradation                                   |
| 51773            | An01g11660        | 17             | Cellulose 1,4- $\beta$ -cellobiosidase (Cellobiohydrolase) ( <i>cbhB</i> )                              | Up on arabinan                      | Cellulose-degradation                                   |
| 57002            | An12g02460        | 17             | $\alpha$ -amylase                                                                                       | Up on arabinan                      | Cellulose-degradation                                   |

Continues on next page

| Continued from last page |            |         |                                                                                               |                           |                                                            |
|--------------------------|------------|---------|-----------------------------------------------------------------------------------------------|---------------------------|------------------------------------------------------------|
| ATCC 1015                | CBS 513.88 | Cluster | Gene                                                                                          | Regulation                | Gene profile                                               |
| 120104                   | An02g07590 | 18      | candidate $\beta$ -glycosidase related to $\beta$ -N-acetylhexosaminidase                     | No clear regulation       | No clear profile.                                          |
| 210387                   | An15g07160 | 18      | pectin lyase                                                                                  | No clear regulation       | No clear profile.                                          |
| 213437                   | An03g03740 | 18      | $\beta$ -glucosidase                                                                          | No clear regulation       | No clear profile.                                          |
| 52811                    | An08g01100 | 18      | candidate $\beta$ -glycosidase related to exo-1,3- $\beta$ -glucanases                        | No clear regulation       | No clear profile.                                          |
| 128654                   | An09g05880 | 19      | $\alpha$ -glucosidase                                                                         | Up on arabinan            | Cellulose-degradation                                      |
| 129891                   | An17g00520 | 19      | $\beta$ -glucosidase                                                                          | Up on arabinan            | Cellulose-degradation                                      |
| 175759                   | An06g02060 | 19      | candidate $\beta$ -glycosidase related to glucan 1,3- $\beta$ -glucosidase                    | Up on arabinan            | Cellulose-degradation                                      |
| 180727                   | An07g04420 | 19      | $\beta$ -galactosidase                                                                        | Up on arabinan            | Cellulose-degradation                                      |
| 190816                   | An04g02700 | 19      | candidate $\alpha$ -glycosidase distantly related to plants alkaline $\alpha$ -galactosidases | Up on arabinan            | Cellulose-degradation                                      |
| 194765                   | An04g08550 | 19      | endo-glucanase                                                                                | Up on arabinan            | Cellulose-degradation                                      |
| 211162                   | An14g04190 | 19      | candidate 1,4- $\alpha$ -glucan branching enzyme                                              | Up on arabinan            | Cellulose-degradation                                      |
| 39337                    | An11g08700 | 19      | endo-rhamnogalacturonase                                                                      | Up on arabinan            | Cellulose-degradation                                      |
| 46621                    | An01g06120 | 19      | candidate $\alpha$ -glycosidase related to glyco-gen-debranching enzyme                       | Up on arabinan            | Cellulose-degradation                                      |
| 53159                    | An07g09330 | 19      | Cellulose 1,4- $\beta$ -cellobiosidase (Cellobiohydrolase) ( <i>cbhA</i> )                    | Up on arabinan            | Cellulose-degradation                                      |
| 205580                   | An01g11670 | 20      | candidate endoglucanase; C-terminal CBM1 module                                               | Up on starch and arabinan | No clear profile.                                          |
| 41815                    | An14g04370 | 20      | pectin lyase ( <i>pelA</i> )                                                                  | Up on starch and arabinan | No clear profile.                                          |
| 44822                    | An13g02110 | 20      | candidate $\alpha$ -glycosidase related to mammalian $\alpha$ -L-fucosidases                  | Up on starch and arabinan | No clear profile.                                          |
| 56664                    | An12g08280 | 20      | exo-inulinase ( <i>inuE/inuF/inuI</i> )                                                       | Up on starch and arabinan | No clear profile.                                          |
| 171269                   | An01g14600 | 21      | Endo-(1,4)- $\beta$ -xylanase                                                                 | Up on arabinan            | Xylan- and pectin-backbone activities                      |
| 182100                   | An15g03550 | 21      | related to $\beta$ -glycosidases                                                              | Up on arabinan            | Xylan- and pectin-backbone activities                      |
| 182156                   | An15g05370 | 21      | endo-Polygalacturonase ( <i>pgaII</i> )                                                       | Up on arabinan            | Xylan- and pectin-backbone activities                      |
| 189722                   | An12g00950 | 21      | endo-Polygalacturonase ( <i>rhgA</i> )                                                        | Up on arabinan            | Xylan- and pectin-backbone activities                      |
| 43522                    | An09g01010 | 21      | Acetylxylan esterase ( <i>axeA</i> )                                                          | Up on arabinan            | Xylan- and pectin-backbone activities                      |
| 52688                    | An08g05230 | 21      | candidate endoglucanase                                                                       | Up on arabinan            | Xylan- and pectin-backbone activities                      |
| 187227                   | An18g05940 | 22      | $\beta$ -1,4-endogalactanase ( <i>galA</i> )                                                  | Up on arabinan            | No clear profile                                           |
| 194461                   | An03g02080 | 22      | exo-poly-D-galacturonase ( <i>rgxB</i> )                                                      | Up on arabinan            | No clear profile                                           |
| 197735                   | An02g10550 | 22      | endo 1,5- $\alpha$ -L-arabinanase                                                             | Up on arabinan            | No clear profile                                           |
| 202490                   | An18g04100 | 22      | candidate glucan 1,3- $\beta$ -glucosidase                                                    | Up on arabinan            | No clear profile                                           |
| 38924                    | An11g03120 | 22      | Endo-(1,4)- $\beta$ -xylanase                                                                 | Up on arabinan            | No clear profile                                           |
| 41877                    | An14g05340 | 22      | distantly related to rhamnogalacturonyl hydrolases                                            | Up on arabinan            | No clear profile                                           |
| 50927                    | An13g03710 | 22      | $\alpha$ -glucosidase                                                                         | Up on arabinan            | No clear profile                                           |
| 170172                   | An01g06620 | 23      | candidate $\alpha$ -L-rhamnosidase                                                            | Up on arabinan            | Exo- $\alpha$ - and $\beta$ -galactosidase and glucosidase |
| 172232                   | An01g01320 | 23      | $\alpha$ -galactosidase                                                                       | Up on arabinan            | Exo- $\alpha$ - and $\beta$ -galactosidase and glucosidase |
| 189620                   | An05g02410 | 23      | $\beta$ -glucuronidase                                                                        | Up on arabinan            | Exo- $\alpha$ - and $\beta$ -galactosidase and glucosidase |
| 207264                   | An02g11150 | 23      | $\alpha$ -galactosidase ( <i>agIB</i> )                                                       | Up on arabinan            | Exo- $\alpha$ - and $\beta$ -galactosidase and glucosidase |
| 210981                   | An14g01770 | 23      | $\beta$ -glucosidase                                                                          | Up on arabinan            | Exo- $\alpha$ - and $\beta$ -galactosidase and glucosidase |
| 214857                   | An04g09690 | 23      | pectin methyltransferase                                                                      | Up on arabinan            | Exo- $\alpha$ - and $\beta$ -galactosidase and glucosidase |
| 37736                    | An06g00170 | 23      | $\alpha$ -galactosidase ( <i>aglA</i> )                                                       | Up on arabinan            | Exo- $\alpha$ - and $\beta$ -galactosidase and glucosidase |
| 41910                    | An14g05820 | 23      | $\beta$ -galactosidase                                                                        | Up on arabinan            | Exo- $\alpha$ - and $\beta$ -galactosidase and glucosidase |
| 46429                    | An01g10350 | 23      | $\beta$ -galactosidase                                                                        | Up on arabinan            | Exo- $\alpha$ - and $\beta$ -galactosidase and glucosidase |
| 51410                    | An04g09070 | 23      | candidate $\alpha$ -L-rhamnosidase                                                            | Up on arabinan            | Exo- $\alpha$ - and $\beta$ -galactosidase and glucosidase |

Continues on next page

| <b>ATCC 1015</b> | <b>CBS 513.88</b> | <b>Cluster</b> | <b>Gene</b>                                                                         | <b>Regulation</b> | <b>Gene profile</b>                                                  |
|------------------|-------------------|----------------|-------------------------------------------------------------------------------------|-------------------|----------------------------------------------------------------------|
| 131668           | An12g05700        | 24             | related to $\alpha$ -L-rhamnosidases                                                | Up on arabinan    | Rhamnogalacturonan I, smooth pectin and xylogalacturonan degradation |
| 131747           | An04g03170        | 24             | $\beta$ -glucosidase                                                                | Up on arabinan    | Rhamnogalacturonan I, smooth pectin and xylogalacturonan degradation |
| 139037           | An07g07630        | 24             | $\beta$ -glucosidase                                                                | Up on arabinan    | Rhamnogalacturonan I, smooth pectin and xylogalacturonan degradation |
| 172236           | An01g14650        | 24             | exo-poly-D-galacturonase ( <i>rgxA</i> )                                            | Up on arabinan    | Rhamnogalacturonan I, smooth pectin and xylogalacturonan degradation |
| 172944           | An02g12450        | 24             | endo-Polygalacturonase ( <i>pgxC</i> )                                              | Up on arabinan    | Rhamnogalacturonan I, smooth pectin and xylogalacturonan degradation |
| 174379           | An02g00140        | 24             | Xylan 1,4- $\beta$ -xylosidase                                                      | Up on arabinan    | Rhamnogalacturonan I, smooth pectin and xylogalacturonan degradation |
| 176039           | An06g02420        | 24             | candidate $\beta$ -glucosidase                                                      | Up on arabinan    | Rhamnogalacturonan I, smooth pectin and xylogalacturonan degradation |
| 177434           | An06g00290        | 24             | $\beta$ -galactosidase                                                              | Up on arabinan    | Rhamnogalacturonan I, smooth pectin and xylogalacturonan degradation |
| 179265           | An11g00200        | 24             | candidate $\beta$ -glucosidase                                                      | Up on arabinan    | Rhamnogalacturonan I, smooth pectin and xylogalacturonan degradation |
| 189254           | An09g02160        | 24             | rhamnogalacturonan acetyltransferase ( <i>rgaeA</i> )                               | Up on arabinan    | Rhamnogalacturonan I, smooth pectin and xylogalacturonan degradation |
| 191158           | An03g06740        | 24             | exo-poly-D-galacturonase ( <i>pgxB</i> )                                            | Up on arabinan    | Rhamnogalacturonan I, smooth pectin and xylogalacturonan degradation |
| 198063           | An08g11070        | 24             | candidate invertase                                                                 | Up on arabinan    | Rhamnogalacturonan I, smooth pectin and xylogalacturonan degradation |
| 203143           | An09g01190        | 24             | endo 1,5- $\alpha$ -L-arabinanase ( <i>abnA</i> )                                   | Up on arabinan    | Rhamnogalacturonan I, smooth pectin and xylogalacturonan degradation |
| 208871           | An11g06080        | 24             | $\beta$ -glucosidase                                                                | Up on arabinan    | Rhamnogalacturonan I, smooth pectin and xylogalacturonan degradation |
| 36414            | An01g01340        | 24             | candidate glycosidase related to a bacterial d-4,5 unsaturated gluconyl hydrolase   | Up on arabinan    | Rhamnogalacturonan I, smooth pectin and xylogalacturonan degradation |
| 40264            | An07g00240        | 24             | candidate $\alpha$ -glycosidase related to bacterial $\alpha$ -L-rhamnosidases      | Up on arabinan    | Rhamnogalacturonan I, smooth pectin and xylogalacturonan degradation |
| 42184            | An12g07500        | 24             | exo-poly-D-galacturonase ( <i>pgaX</i> )                                            | Up on arabinan    | Rhamnogalacturonan I, smooth pectin and xylogalacturonan degradation |
| 42916            | An18g04800        | 24             | candidate membrane-bound $\alpha$ -glycosidase related to $\alpha$ -L-rhamnosidases | Up on arabinan    | Rhamnogalacturonan I, smooth pectin and xylogalacturonan degradation |
| 42917            | An18g04810        | 24             | exo-poly-D-galacturonase ( <i>rgxC</i> )                                            | Up on arabinan    | Rhamnogalacturonan I, smooth pectin and xylogalacturonan degradation |
| 43957            | An05g02440        | 24             | endo-Polygalacturonase ( <i>pgaC</i> )                                              | Up on arabinan    | Rhamnogalacturonan I, smooth pectin and xylogalacturonan degradation |
| 44585            | An03g06310        | 24             | pectin methyltransferase ( <i>pmeA</i> )                                            | Up on arabinan    | Rhamnogalacturonan I, smooth pectin and xylogalacturonan degradation |
| 46255            | An01g14670        | 24             | endo-Polygalacturonase ( <i>pgaE</i> )                                              | Up on arabinan    | Rhamnogalacturonan I, smooth pectin and xylogalacturonan degradation |
| 50997            | An17g00300        | 24             | candidate $\beta$ -glycosylase                                                      | Up on arabinan    | Rhamnogalacturonan I, smooth pectin and xylogalacturonan degradation |
| 55136            | An03g00960        | 24             | $\alpha$ -L-arabinofuranosidase ( <i>axhA</i> )                                     | Up on arabinan    | Rhamnogalacturonan I, smooth pectin and xylogalacturonan degradation |
| 55419            | An01g04880        | 24             | $\alpha$ -glucosidase                                                               | Up on arabinan    | Rhamnogalacturonan I, smooth pectin and xylogalacturonan degradation |

Continued from last page

| <b>ATCC 1015</b> | <b>CBS 513.88</b> | <b>Cluster</b> | <b>Gene</b>                                   | <b>Regulation</b> | <b>Gene profile</b>                                                  |
|------------------|-------------------|----------------|-----------------------------------------------|-------------------|----------------------------------------------------------------------|
| 57436            | An03g00940        | 24             | Endo-(1,4)- $\beta$ -xylanase ( <i>xyxA</i> ) | Up on arabinan    | Rhamnogalacturonan I, smooth pectin and xylogalacturonan degradation |



Table 19: Clustering results for significantly regulated genes coding for polysaccharide-acting enzymes. The first two columns are the gene IDs from the two genome sequencings. The genes are sorted according to clusters. The "Similar to"-column refers to which cluster of App. Table 18/Figure ?? the cluster in this table is similar to. A short description of the expression pattern is found in the Regulation column, while a summary term for the activity profile of the genes of the cluster is found in the Activity profile column (if one such existed)

| ATCC 1015 | CBS 513-88 | Cluster | Gene                                                                                                       | Similar to | Regulation                                               | Gene profile                                |
|-----------|------------|---------|------------------------------------------------------------------------------------------------------------|------------|----------------------------------------------------------|---------------------------------------------|
| 140573    | An11g02100 | 1       | candidate $\beta$ -glycosidase; related to monoglucanase<br>no $\beta$ -glucosidase                        | 14         | Removal of ferulic esters from arabinan and xylan        | Up on xylan and arabinan                    |
| 41703     | An14g02920 | 1       | related to rhamnogalacturonyl hydrolases                                                                   | 14         | Removal of ferulic esters from arabinan and xylan        | Up on xylan and arabinan                    |
| 51478     | An12g10390 | 1       | Ferulic acid esterase B ( <i>faeB</i> )                                                                    | 14         | Removal of ferulic esters from arabinan and xylan        | Up on xylan and arabinan                    |
| 53702     | An16g00540 | 1       | candidate $\alpha$ -glycosidase distantly related to $\alpha$ -1,2-L-fucosidases                           | 14         | Removal of ferulic esters from arabinan and xylan        | Up on xylan and arabinan                    |
| 56782     | An18g03570 | 1       | $\beta$ -glucosidase ( <i>bgfI</i> )                                                                       | 14         | Removal of ferulic esters from arabinan and xylan        | Up on xylan and arabinan                    |
| 184037    | An16g02760 | 2       | candidate $\alpha$ -glycosidase distantly related to $\alpha$ -1,2-L-fucosidases                           | 16         | No clear profile.                                        | Up on arabinose and arabinan                |
| 212893    | An12g01850 | 2       | candidate $\beta$ -glycosidase related to bacterial $\beta$ -mannosidases                                  | 16         | No clear profile.                                        | Up on arabinose and arabinan                |
| 38549     | An08g01710 | 2       | $\alpha$ -L-arabinofuranosidase                                                                            | 16         | No clear profile.                                        | Up on arabinose and arabinan                |
| 50161     | An09g03260 | 2       | endo-Polygalacturonase ( <i>pgaD</i> )                                                                     | 16         | No clear profile.                                        | Up on arabinose and arabinan                |
| 122978    | An08g10780 | 3       | candidate $\beta$ -glucosidase related to galactan 1,3-b-galactosidase; C-terminal CBM35 module            | 15         | No clear profile.                                        | No clear regulation                         |
| 46065     | An04g09700 | 3       | endo-xylogalacturonan hydrolase                                                                            | 15         | No clear profile.                                        | No clear regulation                         |
| 185285    | An14g01800 | 4       | $\alpha$ -galactosidase                                                                                    | 13         | Galactoglucanmannan degradation and arabinofuranosidases | Up on xylan, arabinan and arabinose         |
| 194447    | An03g01050 | 4       | endo-glucanase                                                                                             | 13         | Galactoglucanmannan degradation and arabinofuranosidases | Up on xylan, arabinan and arabinose         |
| 200605    | An15g02300 | 4       | $\alpha$ -L-arabinofuranosidase ( <i>abfB</i> )                                                            | 13         | Galactoglucanmannan degradation and arabinofuranosidases | Up on xylan, arabinan and arabinose         |
| 206387    | An01g00330 | 4       | $\alpha$ -L-arabinofuranosidase ( <i>abfA</i> )                                                            | 13         | Galactoglucanmannan degradation and arabinofuranosidases | Up on xylan, arabinan and arabinose         |
| 51764     | An01g12150 | 4       | $\beta$ -galactosidase ( <i>lacA</i> )                                                                     | 13         | Galactoglucanmannan degradation and arabinofuranosidases | Up on xylan, arabinan and arabinose         |
| 138876    | An11g06540 | 5       | $\beta$ -mannosidase ( <i>mndA</i> )                                                                       | 13         | No clear profile                                         | Up on xylan, arabinan and arabinose         |
| 183088    | An15g04550 | 5       | Endo-(1,4)- $\beta$ -xylanase                                                                              | 13         | No clear profile                                         | Up on xylan, arabinan and arabinose         |
| 188489    | An09g03100 | 6       | $\alpha$ -amylase                                                                                          | 11         | Xylan exo-activities                                     | Up on arabinan, arabinose, xylan and xylose |
| 205670    | An01g09960 | 6       | Xylan 1,4- $\beta$ -xylosidase ( <i>xlnD</i> )                                                             | 11         | Xylan exo-activities                                     | Up on arabinan, arabinose, xylan and xylose |
| 43342     | An09g03300 | 6       | related to $\alpha$ -glycosidases                                                                          | 11         | Xylan exo-activities                                     | Up on arabinan, arabinose, xylan and xylose |
| 47677     | An08g01900 | 6       | Xylan 1,4- $\beta$ -xylosidase                                                                             | 11         | Xylan exo-activities                                     | Up on arabinan, arabinose, xylan and xylose |
| 56619     | An14g05800 | 6       | $\alpha$ -glucuronidase ( <i>agnA</i> )                                                                    | 11         | Xylan exo-activities                                     | Up on arabinan, arabinose, xylan and xylose |
| 211053    | An14g02760 | 7       | endo-glucanase ( <i>eglA</i> )                                                                             | 10         | Xylan-active enzymes                                     | Up on xylan, moreso on xylose               |
| 46290     | An01g13610 | 7       | candidate $\alpha$ -glycosidase related to $\alpha$ -amylases and maltotetraose-forming $\alpha$ -amylases | 10         | Xylan-active enzymes                                     | Up on xylan, moreso on xylose               |
| 51662     | An09g00120 | 7       | Ferulic acid esterase A ( <i>faeA</i> )                                                                    | 10         | Xylan-active enzymes                                     | Up on xylan, moreso on xylose               |
| 52071     | An01g00780 | 7       | Endo-(1,4)- $\beta$ -xylanase ( <i>xynB/xlnB/xylB</i> )                                                    | 10         | Xylan-active enzymes                                     | Up on xylan, moreso on xylose               |
| 122069    | An09g03110 | 8       | $\alpha$ -amylase                                                                                          | 1          | No clear profile.                                        | Arabinan down and Xylose up                 |
| 184195    | An16g02730 | 8       | endo 1,5- $\alpha$ -L-arabinanase                                                                          | 1          | No clear profile.                                        | Arabinan down and Xylose up                 |

Continues on next page

| ATCC 1015 | CBS 513.88 | Cluster | Similar to | Gene                                                                                                          | Regulation                                | Gene profile                            |
|-----------|------------|---------|------------|---------------------------------------------------------------------------------------------------------------|-------------------------------------------|-----------------------------------------|
| 214608    | An16g06800 | 8       | 1          | candidate endoglucanase; C-terminal CBM1 module                                                               | No clear profile.                         | Arabinan down and Xylose up             |
| 44520     | An03g05330 | 8       | 1          | $\beta$ -glucosidase                                                                                          | No clear profile.                         | Arabinan down and Xylose up             |
| 191511    | An03g05530 | 9       | 4 and 6    | endo-glucanase                                                                                                | Endo-acting enzymes                       | Induced by high sugar-concentrations    |
| 210233    | An15g04570 | 9       | 4 and 6    | candidate $\beta$ -glucosidase distantly related to endoglucanases; C-terminal CBM1 module                    | Endo-acting enzymes                       | Induced by high sugar-concentrations    |
| 211163    | An14g04200 | 9       | 4 and 6    | rhamnogalacturonase B ( <i>rhgB</i> )                                                                         | Endo-acting enzymes                       | Induced by high sugar-concentrations    |
| 214598    | An16g06990 | 9       | 4 and 6    | endo-Polygalacturonase ( <i>pgaA</i> )                                                                        | Endo-acting enzymes                       | Induced by high sugar-concentrations    |
| 52219     | An02g04900 | 9       | 4 and 6    | endo-Polygalacturonase ( <i>pgaB</i> )                                                                        | Endo-acting enzymes                       | Induced by high sugar-concentrations    |
| 55204     | An04g09890 | 9       | 4 and 6    | membrane-bound $\alpha$ -1,3-glucan synthase (EC 2.4.1.183); N-terminal GH13 module and C-terminal GT5 module | Endo-acting enzymes                       | Induced by high sugar-concentrations    |
| 206445    | An02g00850 | 10      | 3 and 6    | glucoamylase (exo-1,4-glucosidase/amyloglucosidase)                                                           | Amylases and pectin lyase                 | Up on glucose and starch, down on xylan |
| 45304     | An04g06930 | 10      | 3 and 6    | $\alpha$ -amylase                                                                                             | Amylases and pectin lyase                 | Up on glucose and starch, down on xylan |
| 45821     | An03g00190 | 10      | 3 and 6    | pectin lyase ( <i>pelB</i> )                                                                                  | Amylases and pectin lyase                 | Up on glucose and starch, down on xylan |
| 119858    | An01g10930 | 11      | 5          | candidate $\alpha$ -glucosidase                                                                               | Starch-degradation                        | Up on starch and glucose                |
| 140567    | An11g03340 | 11      | 5          | $\alpha$ -amylase                                                                                             | Starch-degradation                        | Up on starch and glucose                |
| 213597    | An03g06550 | 11      | 5          | glucoamylase (exo-1,4-glucosidase/amyloglucosidase) ( <i>gliaA</i> )                                          | Starch-degradation                        | Up on starch and glucose                |
| 214233    | An04g06920 | 11      | 5          | $\alpha$ -glucosidase ( <i>aglA/aglU</i> )                                                                    | Starch-degradation                        | Up on starch and glucose                |
| 120104    | An02g07590 | 12      | 18         | candidate $\beta$ -glucosidase related to $\beta$ -N-acetylhexosaminidase                                     | No clear profile.                         | No clear regulation                     |
| 210387    | An15g07160 | 12      | 18         | pectin lyase                                                                                                  | No clear profile.                         | No clear regulation                     |
| 54378     | An09g03070 | 12      | 18         | candidate $\alpha$ -1,3-glucan synthase; N-terminal GH13 module and C-terminal GT5 module                     | No clear profile.                         | No clear regulation                     |
| 41815     | An14g04370 | 13      | 20         | pectin lyase ( <i>pelA</i> )                                                                                  | Pectin lyases and glucanases/glucosidases | Up on starch and arabinan               |
| 52011     | An01g03340 | 13      | 20         | xyloglucan-specific endo- $\beta$ -1,4-glucanase ( <i>xeg12A</i> )                                            | Pectin lyases and glucanases/glucosidases | Up on starch and arabinan               |
| 56664     | An12g08280 | 13      | 20         | exo-inulinase ( <i>inuE/inuF/inuI</i> )                                                                       | Pectin lyases and glucanases/glucosidases | Up on starch and arabinan               |
| 128654    | An09g05880 | 14      | 19         | $\alpha$ -glucosidase                                                                                         | Glucans and glucosidases                  | Up on arabinan and glucose              |
| 129891    | An17g00520 | 14      | 19         | $\beta$ -glucosidase                                                                                          | Glucans and glucosidases                  | Up on arabinan and glucose              |
| 190816    | An04g02700 | 14      | 19         | candidate $\alpha$ -glucosidase distantly related to plants alkaline $\alpha$ -galactosidases                 | Glucans and glucosidases                  | Up on arabinan and glucose              |
| 194765    | An04g08550 | 14      | 19         | endo-glucanase                                                                                                | Glucans and glucosidases                  | Up on arabinan and glucose              |
| 211162    | An14g04190 | 14      | 19         | candidate 1,4- $\alpha$ -glucan branching enzyme                                                              | Glucans and glucosidases                  | Up on arabinan and glucose              |
| 53159     | An07g09330 | 14      | 19         | Cellulose 1,4- $\beta$ -cellobiosidase (Cellobiohydrolase) ( <i>cbhA</i> )                                    | Glucans and glucosidases                  | Up on arabinan and glucose              |
| 39337     | An11g08700 | 15      | 19         | endo-rhamnogalacturonase                                                                                      | No clear profile                          | Up on arabinan                          |
| 46621     | An01g06120 | 15      | 19         | candidate $\alpha$ -glucosidase related to glycogen-debranching enzyme                                        | No clear profile                          | Up on arabinan                          |
| 170172    | An01g06620 | 16      | 17 and 23  | candidate $\alpha$ -L-rhamnosidase                                                                            | Cellulose-degradation and rhamnosidases   | Up on arabinan                          |
| 187227    | An18g05940 | 16      | 17 and 23  | $\beta$ -1,4-endogalactanase ( <i>galA</i> )                                                                  | Cellulose-degradation and rhamnosidases   | Up on arabinan                          |
| 210716    | An16g02100 | 16      | 17 and 23  | candidate $\beta$ -glucosidase                                                                                | Cellulose-degradation and rhamnosidases   | Up on arabinan                          |
| 51410     | An04g09070 | 16      | 17 and 23  | candidate $\alpha$ -L-rhamnosidase                                                                            | Cellulose-degradation and rhamnosidases   | Up on arabinan                          |

Continued from last page

| ATCC 1015 | CBS 513.88 | Cluster | Similar to | Gene                                                                       | Regulation                                                                         | Gene profile   |
|-----------|------------|---------|------------|----------------------------------------------------------------------------|------------------------------------------------------------------------------------|----------------|
| 51773     | An01g11660 | 16      | 17 and 23  | Cellulose 1,4- $\beta$ -cellobiosidase (Cellobiohydrolase) ( <i>cbhB</i> ) | Cellulose-degradation and rhamnosidases                                            | Up on arabinan |
| 182156    | An15g05370 | 17      | 21-22      | endo-Polygalacturonase ( <i>pgaII</i> )                                    | Xylan- and pectin-backbone activities                                              | Up on arabinan |
| 189722    | An12g00950 | 17      | 21-22      | endo-Polygalacturonase ( <i>rhgA</i> )                                     | Xylan- and pectin-backbone activities                                              | Up on arabinan |
| 194461    | An03g02080 | 17      | 21-22      | exo-poly-D-galacturonase ( <i>(rgxB)</i> )                                 | Xylan- and pectin-backbone activities                                              | Up on arabinan |
| 197735    | An02g10550 | 17      | 21-22      | endo 1,5- $\alpha$ -L-arabinanase                                          | Xylan- and pectin-backbone activities                                              | Up on arabinan |
| 202490    | An18g04100 | 17      | 21-22      | candidate glucan 1,3- $\beta$ -glucosidase                                 | Xylan- and pectin-backbone activities                                              | Up on arabinan |
| 38924     | An11g03120 | 17      | 21-22      | Endo-(1,4)- $\beta$ -xylanase                                              | Xylan- and pectin-backbone activities                                              | Up on arabinan |
| 41877     | An14g05340 | 17      | 21-22      | distantly related to rhamnogalacturonyl hydrolases                         | Xylan- and pectin-backbone activities                                              | Up on arabinan |
| 44585     | An03g06310 | 17      | 21-22      | pectin methyltransferase ( <i>pmeA</i> )                                   | Xylan- and pectin-backbone activities                                              | Up on arabinan |
| 50927     | An13g03710 | 17      | 21-22      | $\alpha$ -glucosidase                                                      | Xylan- and pectin-backbone activities                                              | Up on arabinan |
| 52688     | An08g05230 | 17      | 21-22      | candidate endoglucanase                                                    | Xylan- and pectin-backbone activities                                              | Up on arabinan |
| 207264    | An02g11150 | 18      | 23         | $\alpha$ -galactosidase ( <i>aglB</i> )                                    | No clear profile                                                                   | Up on arabinan |
| 214857    | An04g09690 | 18      | 23         | pectin methyltransferase                                                   | No clear profile                                                                   | Up on arabinan |
| 172232    | An01g01320 | 19      | 23         | $\alpha$ -galactosidase                                                    | Exo- $\alpha$ - and $\beta$ -galactosidase and $\alpha$ - and $\beta$ -glucosidase | Up on arabinan |
| 189620    | An05g02410 | 19      | 23         | $\beta$ -glucuronidase                                                     | Exo- $\alpha$ - and $\beta$ -galactosidase and $\alpha$ - and $\beta$ -glucosidase | Up on arabinan |
| 210981    | An14g01770 | 19      | 23         | $\beta$ -glucosidase                                                       | Exo- $\alpha$ - and $\beta$ -galactosidase and $\alpha$ - and $\beta$ -glucosidase | Up on arabinan |
| 37736     | An06g00170 | 19      | 23         | $\alpha$ -galactosidase ( <i>aglA</i> )                                    | Exo- $\alpha$ - and $\beta$ -galactosidase and $\alpha$ - and $\beta$ -glucosidase | Up on arabinan |
| 41910     | An14g05820 | 19      | 23         | $\beta$ -galactosidase                                                     | Exo- $\alpha$ - and $\beta$ -galactosidase and $\alpha$ - and $\beta$ -glucosidase | Up on arabinan |
| 46429     | An01g10350 | 19      | 23         | $\beta$ -galactosidase                                                     | Exo- $\alpha$ - and $\beta$ -galactosidase and $\alpha$ - and $\beta$ -glucosidase | Up on arabinan |
| 131668    | An12g05700 | 20      | 24         | related to $\alpha$ -L-rhamnosidases                                       | Rhamnogalacturonan I, smooth pectin and xylogalacturonan degradation               | Up on arabinan |
| 131747    | An04g03170 | 20      | 24         | $\beta$ -glucosidase                                                       | Rhamnogalacturonan I, smooth pectin and xylogalacturonan degradation               | Up on arabinan |
| 172236    | An01g14650 | 20      | 24         | exo-poly-D-galacturonase ( <i>(rgxA)</i> )                                 | Rhamnogalacturonan I, smooth pectin and xylogalacturonan degradation               | Up on arabinan |
| 172944    | An02g12450 | 20      | 24         | endo-Polygalacturonase ( <i>(pgxC)</i> )                                   | Rhamnogalacturonan I, smooth pectin and xylogalacturonan degradation               | Up on arabinan |
| 174379    | An02g00140 | 20      | 24         | Xylan 1,4- $\beta$ -xylosidase                                             | Rhamnogalacturonan I, smooth pectin and xylogalacturonan degradation               | Up on arabinan |

Continues on next page

| ATCC 1015 | CBS 513.88 | Cluster | Similar to | Gene                                                                                | Regulation                                                        | Gene profile      |
|-----------|------------|---------|------------|-------------------------------------------------------------------------------------|-------------------------------------------------------------------|-------------------|
| 177434    | An06g00290 | 20      | 24         | $\beta$ -galactosidase                                                              | Rhamnogalacturonan smooth pectin and xylogalacturonan degradation | I, Up on arabinan |
| 179265    | An11g00200 | 20      | 24         | candidate $\beta$ -glucosidase                                                      | Rhamnogalacturonan smooth pectin and xylogalacturonan degradation | I, Up on arabinan |
| 189254    | An09g02160 | 20      | 24         | rhamnogalacturonan acetyltransferase ( <i>rgaeA</i> )                               | Rhamnogalacturonan smooth pectin and xylogalacturonan degradation | I, Up on arabinan |
| 191158    | An03g06740 | 20      | 24         | exo-poly-D-galacturonase ( <i>pgxB</i> )                                            | Rhamnogalacturonan smooth pectin and xylogalacturonan degradation | I, Up on arabinan |
| 198063    | An08g11070 | 20      | 24         | candidate invertase                                                                 | Rhamnogalacturonan smooth pectin and xylogalacturonan degradation | I, Up on arabinan |
| 203143    | An09g01190 | 20      | 24         | endo 1,5- $\alpha$ -L-arabinanase ( <i>abnA</i> )                                   | Rhamnogalacturonan smooth pectin and xylogalacturonan degradation | I, Up on arabinan |
| 208871    | An11g06080 | 20      | 24         | $\beta$ -glucosidase                                                                | Rhamnogalacturonan smooth pectin and xylogalacturonan degradation | I, Up on arabinan |
| 36414     | An01g01340 | 20      | 24         | candidate glycosidase related to a bacterial d-4,5 unsaturated glucuronyl hydrolase | Rhamnogalacturonan smooth pectin and xylogalacturonan degradation | I, Up on arabinan |
| 42184     | An12g07500 | 20      | 24         | exo-poly-D-galacturonase ( <i>pggX</i> )                                            | Rhamnogalacturonan smooth pectin and xylogalacturonan degradation | I, Up on arabinan |
| 42916     | An18g04800 | 20      | 24         | candidate membrane-bound $\alpha$ -glycosidase related to $\alpha$ -L-rhamnosidases | Rhamnogalacturonan smooth pectin and xylogalacturonan degradation | I, Up on arabinan |
| 42917     | An18g04810 | 20      | 24         | exo-poly-D-galacturonase ( <i>rgxC</i> )                                            | Rhamnogalacturonan smooth pectin and xylogalacturonan degradation | I, Up on arabinan |
| 43957     | An05g02440 | 20      | 24         | endo-Polygalacturonase ( <i>pgaC</i> )                                              | Rhamnogalacturonan smooth pectin and xylogalacturonan degradation | I, Up on arabinan |
| 46255     | An01g14670 | 20      | 24         | endo-Polygalacturonase ( <i>pgaF</i> )                                              | Rhamnogalacturonan smooth pectin and xylogalacturonan degradation | I, Up on arabinan |
| 50997     | An17g00300 | 20      | 24         | candidate $\beta$ -glucosidase                                                      | Rhamnogalacturonan smooth pectin and xylogalacturonan degradation | I, Up on arabinan |
| 55136     | An03g00960 | 20      | 24         | $\alpha$ -L-arabinofuranosidase ( <i>axhA</i> )                                     | Rhamnogalacturonan smooth pectin and xylogalacturonan degradation | I, Up on arabinan |
| 55419     | An01g04880 | 20      | 24         | $\alpha$ -glucosidase                                                               | Rhamnogalacturonan smooth pectin and xylogalacturonan degradation | I, Up on arabinan |
| 57436     | An03g00940 | 20      | 24         | Endo-(1,4)- $\beta$ -xylanase ( <i>xyrA</i> )                                       | Rhamnogalacturonan smooth pectin and xylogalacturonan degradation | I, Up on arabinan |
